# Supplementary material for: Histone methyltransferase SETDB1 safeguards mouse fetal hematopoiesis by suppressing activation of cryptic enhancers
Source: PubMed Central journal article supplement — Proc Natl Acad Sci U S A. 2024 Dec 17;121(52):e2409656121. doi: 10.1073/pnas.2409656121 (PMC11670114; doi:10.1073/pnas.2409656121), 2024-12-17
Supplement: pnas.2409656121.sapp.pdf [file pnas.2409656121.sapp.pdf]

## **Supporting Information for**

## Histone methyltransferase SETDB1 safeguards mouse fetal hematopoiesis by suppressing activation of cryptic enhancers

Maryam Kazerani, Filippo Cernilogar, Alessandra Pasquarella, Maria Hinterberger, Alexander Nuber, Ludger Klein, Gunnar Schotta

Gunnar Schotta

Email: [gunnar.schotta@bmc.med.lmu.de](mailto:gunnar.schotta@bmc.med.lmu.de)

### **This PDF file includes:**

Supporting text  
Figures S1 to S8  
Tables S1 to S11

### **Other supporting materials for this manuscript include the following:**

none

## Supporting Information Text

### Extended Methods

#### ULI-NChIP-sequencing

5000 LSK cells were sorted from E13.5 *Setdb1<sup>vaV</sup>* and control fetal livers into low-binding tubes and centrifuged. The cell pellet was resuspended in 20  $\mu$ L of EZ nuclei isolation lysis buffer (Sigma) containing 0.1% Triton, 0.1% deoxycholate, 1x cOmplete EDTA-free Protease Inhibitor Cocktail (Roche Diagnostics), 1 mM PMSF, flash frozen and kept at -80 °C. Chromatin fragmentation and immunoprecipitation were performed following the ultra-low-input micrococcal nuclease-based native ChIP (ULI-NChIP) protocol with minor modifications (1). Briefly, after thawing cells in nuclei isolation lysis buffer, 10% of the volume of 1% Triton/1% deoxycholate solution was added. Chromatin was fragmented using MNase (Biolabs) enzyme at 1.5 U/ $\mu$ L in MNase digestion buffer (1X MNase Reaction Buffer, 100 mM DTT, 50% PEG 6000, and ultrapure H<sub>2</sub>O) for 7.5 minutes at 21°C. Reaction was stopped by adding 10% of the reaction volume of 100  $\mu$ M EDTA and 1% Triton/1% deoxycholate solution. To 120  $\mu$ L fragmented chromatin, 380  $\mu$ L of complete immunoprecipitation buffer (20 mM Tris-HCl pH 8.0, 2 mM EDTA, 150 mM NaCl, 0.1% Triton X-100, 1x cOmplete EDTA-free Protease Inhibitor Cocktail, 1 mM PMSF) was added. Chromatin was rotated for 1 hour at 4°C and 13 rpm. For input, 100  $\mu$ L of sample was taken, 10% volume of 10% SDS (10  $\mu$ L) was added and mixed with 90  $\mu$ L elution buffer (Qiagen). Chromatin was pre-cleared with 1:1 protein A:protein G Dynabeads (Thermo Fischer Scientific) and incubated for 3 hours on a rotator at 4°C and 13 rpm. In parallel, per IP tube, 0.25  $\mu$ g of H3K9me3 antibody (Active motif) was incubated with 5  $\mu$ L of pre-washed 1:1 protein A:protein G Dynabeads (Thermo Fischer Scientific) in 100  $\mu$ L complete immunoprecipitation buffer for 3 hours on a rotator at 4°C and 13 rpm. The antibody-coated beads were washed 1X with 200  $\mu$ L complete immunoprecipitation buffer

and the pre-cleared chromatin was then added to the antibody-beads complex. The immunoprecipitation was carried out overnight (12 hours) at 4°C whilst rocking at 13rpm. Chromatin-bound beads were first washed 3X, each for 10 min at 4°C and 20 rpm with 500 µL low salt wash buffer (20 mM Tris-HCl (pH 8.0), 2 mM EDTA, 150 mM NaCl, 1% Triton X-100, 0.1% SDS) and then 3X with high salt wash buffer (20 mM Tris-HCl pH 8.0, 2 mM EDTA, 500 mM NaCl, 1% Triton X-100, 0.1% SDS). Per sample, 2 IP tubes were pooled and were eluted in 30 µL freshly prepared ChIP elution buffer (100 mM NaHCO<sub>3</sub>, 1% SDS) for 1.5 hours at 65°C in a thermo-shaker. To maximize the elution, additional 70 µL freshly prepared ChIP elution buffer was added to the beads. DNA isolation was carried out by Agencourt AMPure XP beads (Beckman Coulter) from input and ChIP samples. Samples were quantified in a Qubit 3.0 Fluorometer with Qubit dsDNA HS Assay kit (Thermo Fischer Scientific). Fragmentation of MNase-treated chromatin was assessed on input sample by the Agilent High Sensitivity DNA Kit (Agilent Technologies). Input and ChIP samples were subjected to library preparation with MicroPlex Library Preparation Kit v2 (Diagenode). The quantity of the libraries was assessed in a Qubit 3.0 Fluorometer with Qubit dsDNA HS Assay kit (Thermo Fischer Scientific). Libraries were further qualified by the Agilent High Sensitivity DNA Kit (Agilent Technologies). Libraries were sequenced using Illumina's HiSeq 1500 sequencer for 50 bp single-end (SE) reads at the Laboratory for Functional Genome Analysis (LAFUGA) within the Gene Center (LMU Munich).

### **Omni-ATAC-sequencing**

ATAC-seq was performed as previously described (2). Briefly, 10,000 LSK cells were sorted from E13.5 Setdb1<sup>val</sup> and control fetal livers into low-binding tubes. Cells were spun at 500 g for 5 min at 4°C. Cell pellets were resuspended and lysed in cold ATAC Resuspension Buffer (10mM Tris-HCl pH 7.4, 10 mM NaCl, 3 mM MgCl<sub>2</sub>) containing 0.1% NP40, 0.1% Tween-20, and 0.01% digitonin. Cell lysis reaction was incubated on ice for

3 min and then 1 ml of ATAC Resuspension Buffer containing only 0.1% Tween-20 was added and centrifuged at 500 g for 5 min at 4°C. Nuclei were then resuspended in 10 µL of Transposition Mix containing 25 µL 2x Tagmentation Buffer (20 mM Tris-HCl pH 7.6, 10 mM MgCl<sub>2</sub>, 20% dimethyl Formamide, H<sub>2</sub>O), 2.5 µL Tn5 Transposase (Illumina), 5.25 µL H<sub>2</sub>O, 16.5 µL PBS, 0.25 µL of 2% digitonin (Promega) and 0.5 µL of 10% Tween-20. Reactions were proceeded by incubation for 30 min at 37°C in a thermo-shaker at 900 rpm. DNA was subsequently purified using PCR clean-up MinElute kit (Qiagen). Libraries were amplified in 50 µL reactions with custom primers. Amplified libraries were purified with the PCR clean-up MinElute kit (Qiagen) and size selected for fragments less than 600 bp using the Agencourt AMPure XP beads (Beckman Coulter). Libraries were quantified in a Qubit 3.0 Fluorometer with Qubit dsDNA HS Assay kit (Thermo Fischer Scientific). Further quantification of the libraries was performed by the Agilent High Sensitivity DNA Kit (Agilent Technologies). Libraries were sequenced using Illumina's HiSeq 1500 sequencer for 50 bp single-end (SE) reads at the Laboratory for Functional Genome Analysis (LAFUGA) within the Gene Center (LMU Munich).

### **RNA-sequencing**

To isolate total RNA, E13.5 *Setdb1*<sup>va</sup> and control fetal liver LT-HSCs and MPPs were sorted directly into the 100 µl extraction buffer, provided by PicoPure RNA Isolation Kit (Thermo Fischer Scientific). Total RNA isolation was carried out according to the manufacturer's instructions. DNase treatment was performed on column using RNase-Free DNase Set (Qiagen). RNA quantity and quality were assessed on an Agilent 2100 Bioanalyzer by the Agilent RNA 6000 Pico Kit (Agilent Technologies). High-quality RNA samples with RNA Integrity Number (RIN) > 8 were used for cDNA synthesis with SMART-Seq v4 Ultra Low Input RNA Kit (Clontech) according to the manufacturer's instruction. Before proceeding to library preparation, cDNA was sheared in a Covaris S220 device

(PP 175; DF 10; CB 200; 5 min; 4°C) to the size range of 200–500 bp and subjected to library preparation with MicroPlex Library Preparation Kit v2 (Diagenode). The quantity of the libraries was assessed in a Qubit 3.0 Fluorometer with Qubit dsDNA HS Assay kit (Thermo Fischer Scientific). Libraries were further quantified by the Agilent High Sensitivity DNA Kit (Agilent Technologies). Libraries were sequenced using Illumina's HiSeq 1500 sequencer for 50 bp paired end (PE) reads at the Laboratory for Functional Genome Analysis (LAFUGA) within the Gene Center (LMU Munich).

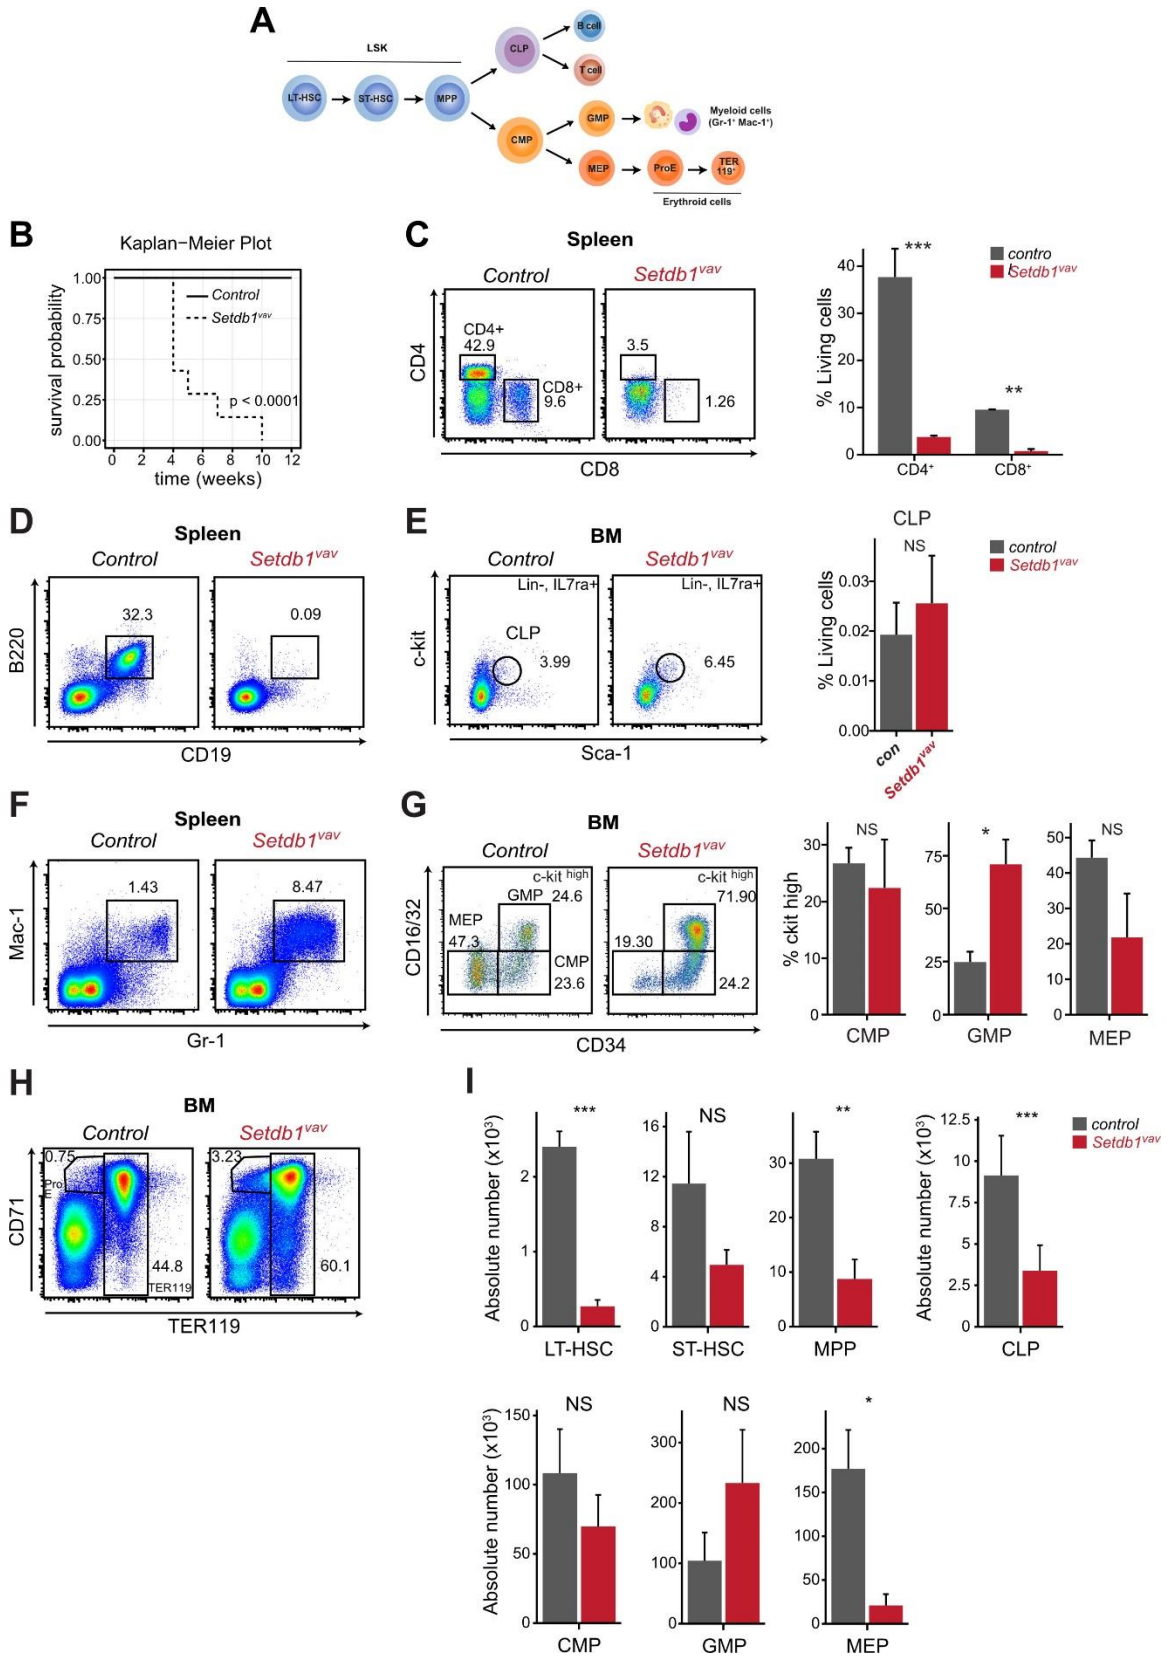

**Fig. S1. Impaired hematopoietic lineage differentiation in postnatal *Setdb1<sup>va/v</sup>* mice**

**(A)** Schematic of hematopoietic differentiation and cell types analyzed in this study. **(B)** Kaplan Meier plot showing survival of control and *Setdb1<sup>va/v</sup>* mice. **(C)** Representative FACS plots and bar graphs showing percentages of CD4<sup>+</sup> and CD8<sup>+</sup> T cells in the spleen of 2-week-old control and *Setdb1<sup>va/v</sup>* mice (n = 3). **(D)** Representative FACS plots showing B cells in the spleen of control and *Setdb1<sup>va/v</sup>* mice. **(E)** Representative FACS plots and bar graphs showing percentages of CLP cells in the bone marrow of 2-week-old control and *Setdb1<sup>va/v</sup>* mice (n = 7). **(F)** Representative FACS plots showing Gr-1<sup>+</sup> Mac-1<sup>+</sup> cells in the spleen of control and *Setdb1<sup>va/v</sup>* mice. **(G)** Representative FACS plots and bar graphs showing percentages of CMP, GMP, and MEP cells in the bone marrow of 2-week-old control and *Setdb1<sup>va/v</sup>* mice (n = 3). **(H)** Representative FACS plots showing ProE, and TER119<sup>+</sup> cells in the bone marrow of control and *Setdb1<sup>va/v</sup>* mice. **(I)** Absolute numbers of hematopoietic stem and progenitor cell populations in postnatal control and *Setdb1<sup>va/v</sup>* mice. Data are shown as mean ± SD. \*P < 0.05, \*\*P < 0.01, \*\*\*P < 0.001 (unpaired two-tailed Student's t-test); CLP, common lymphoid progenitor; CMP, common myeloid progenitor; GMP, granulocyte-monocyte progenitor; MEP, megakaryocyte–erythroid progenitor; NS, not significant.

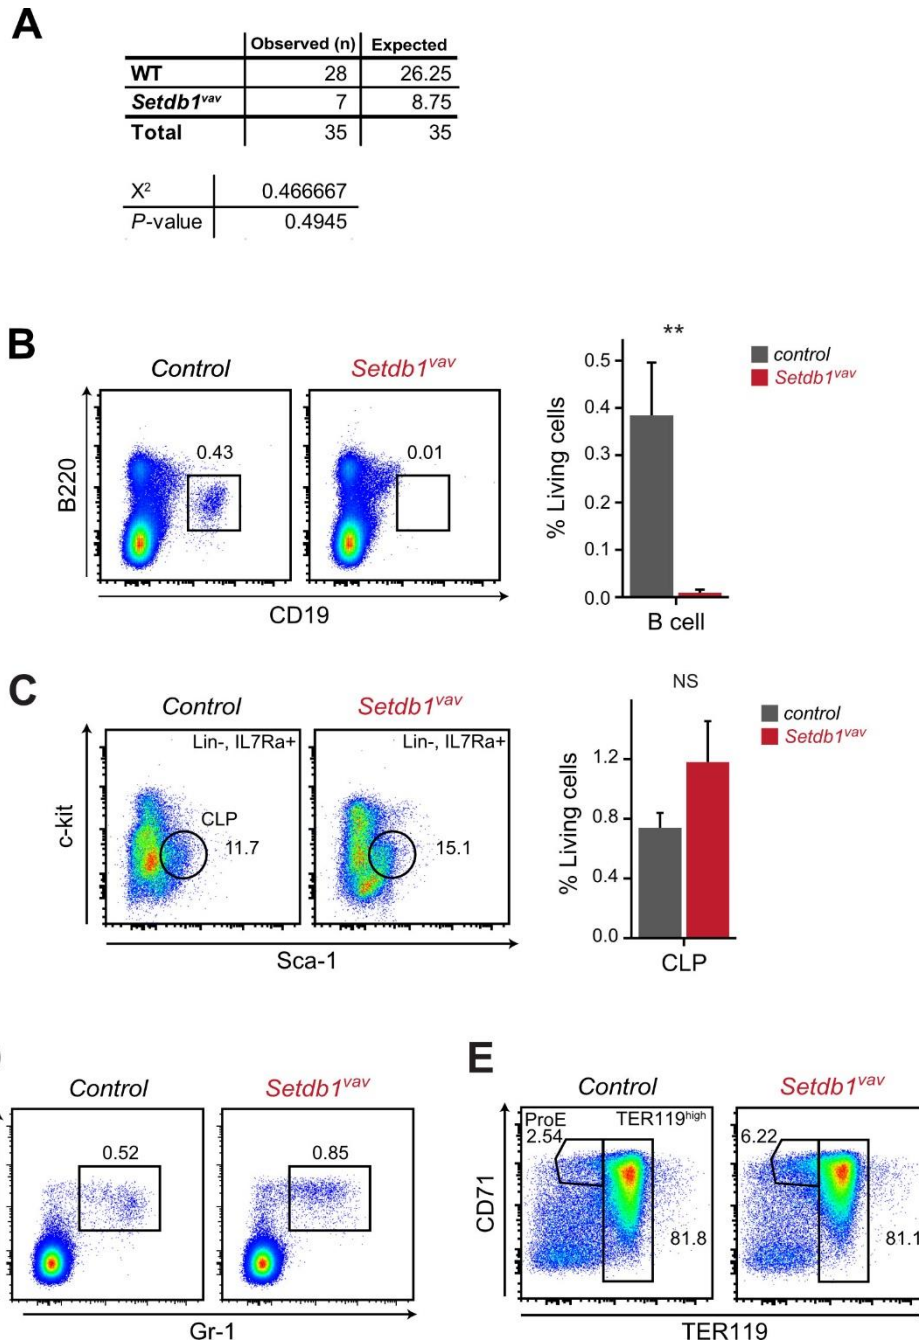

**Fig. S2. Myeloerythroid differentiation bias in *Setdb1<sup>vav</sup>* Fetal Livers**

(A) Expected and observed Mendelian inheritance in embryos at E13.5. *P*-value was calculated with the Chi-square test. High *P* value indicates no significant deviation from the expected Mendelian Ratio. (B) Representative FACS plots and bar graph showing percentages of B cells in control and *Setdb1<sup>vav</sup>* E13.5 fetal livers (*n* = 3). (C) Representative FACS plots and bar graph showing percentages of CLP cells in control and *Setdb1<sup>vav</sup>* E13.5 fetal livers (*n* = 3). (D) Representative FACS plots showing Gr-1+ Mac-1+ cells and (E) ProE as well as TER119+ erythroblasts in control and *Setdb1<sup>vav</sup>* E13.5 fetal livers. Data are shown as mean  $\pm$  SD. \*\**P* < 0.01, (unpaired two-tailed Student's *t*-test); NS, not significant.



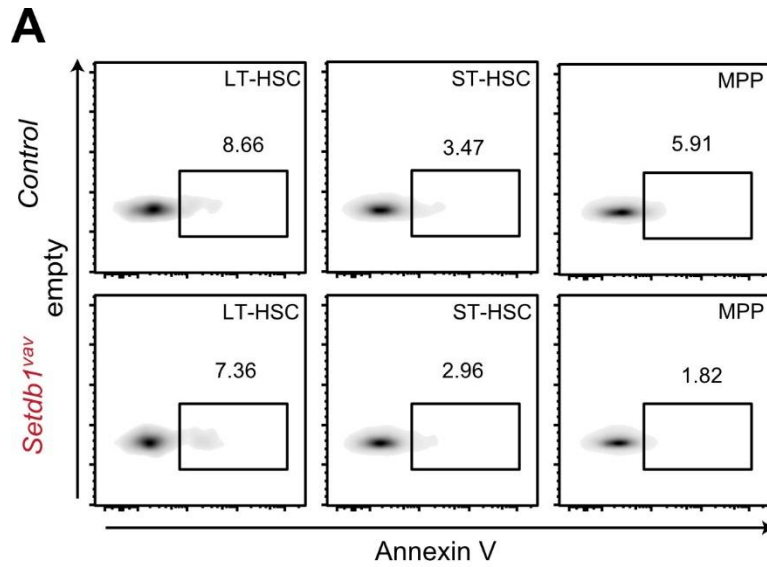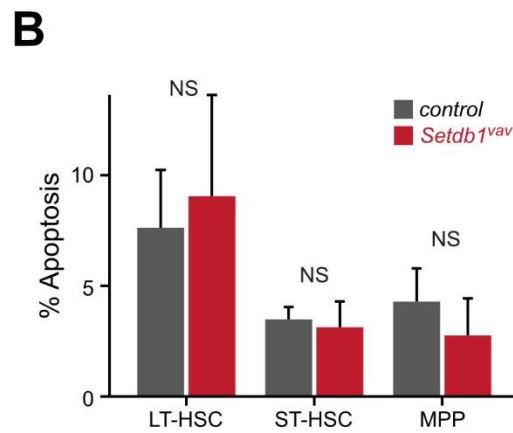

**Fig. S3. Normal survival of *Setdb1<sup>vav</sup>* FL HSPCs**

**(A)** Representative FACS plots and **(B)** bar graph showing percentages of apoptotic cells (Annexin V+) in LT-HSC, ST-HSC, and MPP cells in control and *Setdb1<sup>vav</sup>* E13.5 fetal livers (n = 4). Data are shown as mean  $\pm$  SD. unpaired two-tailed Student's t-test; NS, not significant.

**A**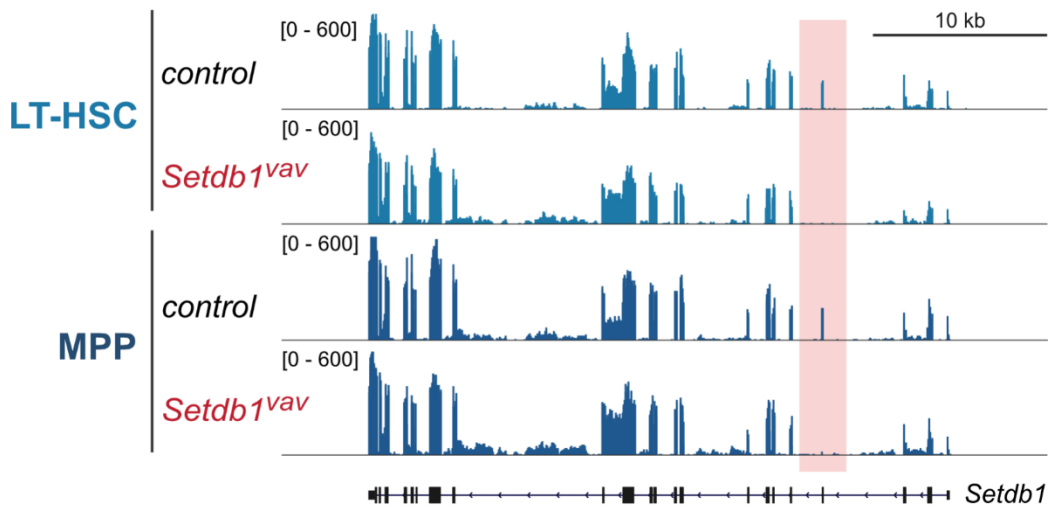

**Fig. S4. Efficient deletion of *Setdb1* in *Setdb1*<sup>vav</sup> LT-HSC and MPP**

**(A)** Genome browser view showing RNA-seq tracks in the *Setdb1* locus. Red-colored box indicates exon 4 which is efficiently deleted in *Setdb1*<sup>vav</sup> LT-HSC and MPP cells.

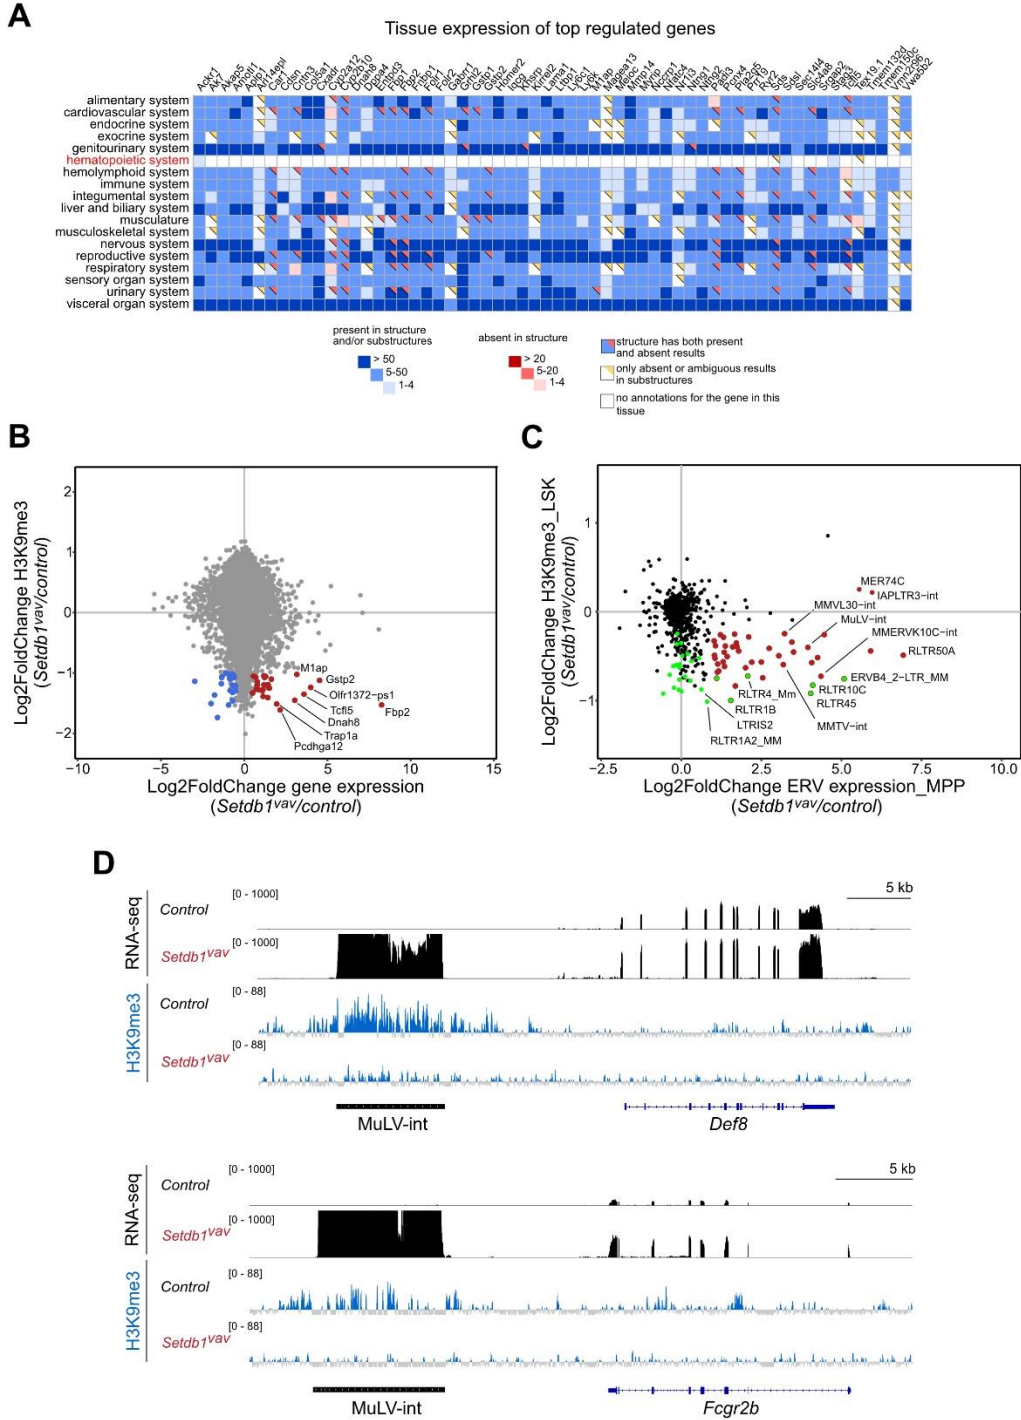

**Fig. S5. Non-hematopoietic genes and retrotransposons lose H3K9me3 and are derepressed in *Setdb1<sup>vav</sup>* HSPCs**

(A) Tissue expression of top 60 up-regulated genes in *Setdb1<sup>vav</sup>* MPPs (<https://www.informatics.jax.org/expression.shtml>). (B) Scatter plot showing gene expression changes vs. changes in promoter H3K9me3 (-4kb - +1kb relative to TSS) of genes. Highlighted are significantly upregulated (red) or downregulated (blue) genes in *Setdb1<sup>vav</sup>* MPPs (Padj < 0.05, abs log2 fold change > 0.5) with reduced H3K9me3 (log2 fold change < -1). (C) Scatter plot showing

changes in expression of ERV families vs. changes in ERV family H3K9me3 occupancy. Highlighted in red are significantly upregulated ERV families in *Setdb1<sup>vaV</sup>* MPPs (Padj < 0.01, log2 fold change > 1). ERV families with significantly reduced H3K9me3 (Padj < 0.05) are marked in green. **(D)** Genome browser view showing expression (RNA-seq) and H3K9me3 on two genomic regions with derepressed MuLV elements in *Setdb1<sup>vaV</sup>* MPPs. Genes in the vicinity of MuLVs (*Def8*, *Fcgr2b*) display increased expression in *Setdb1<sup>vaV</sup>* MPPs.

**A**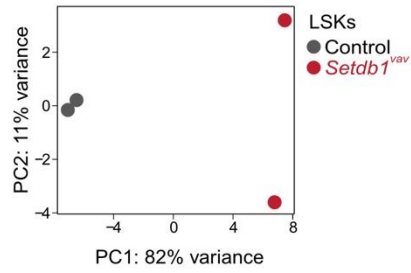**B**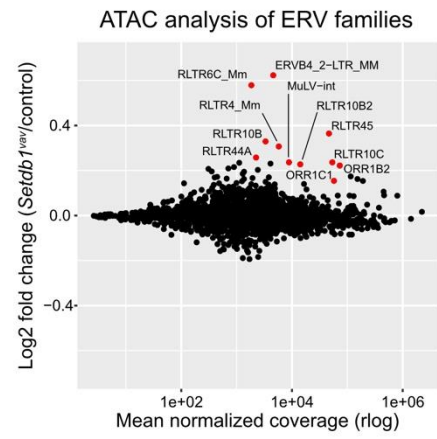**C**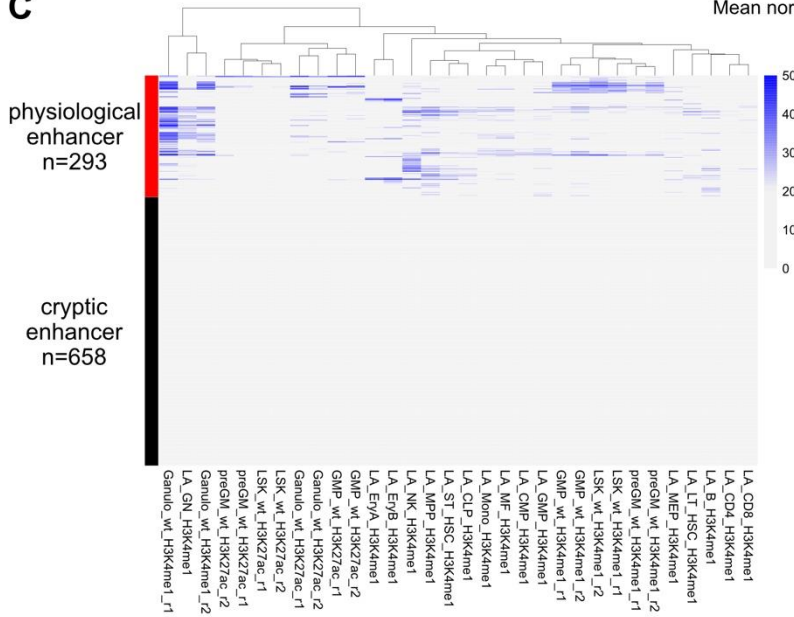**D**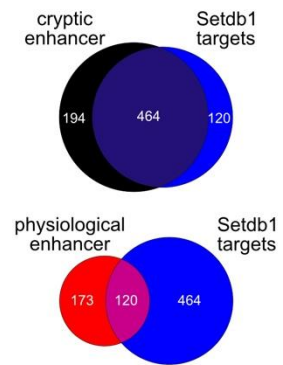**E**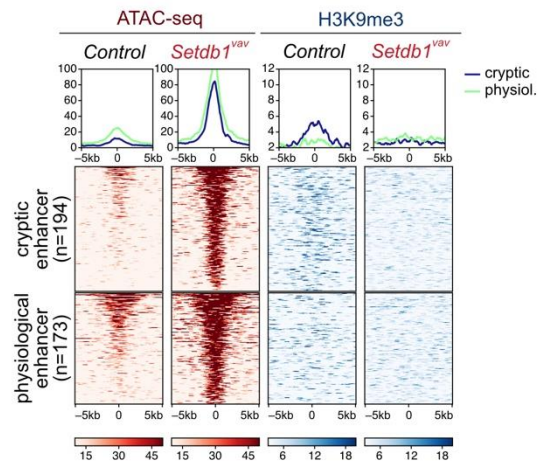

**Fig. S6. Enhanced chromatin accessibility on ERVs and enhancer regions in *Setdb1<sup>va</sup>* LSK cells**

**(A)** PCA of ATAC-seq peaks coverage in control vs. *Setdb1<sup>va</sup>* LSK cells. **(B)** Association of *Setdb1<sup>va</sup>* upregulated ATAC peaks with ERV families. Bar plot shows the proportion of ATAC\_up peaks overlapping with ERVs. **(C)** Clustered heatmap showing normalized read coverage for enhancer chromatin modifications H3K4me1 or H3K27ac on ATAC\_up peaks using Lara-Astiaso et al. 2014 and Pundhir et al., 2018 data. ATAC\_up peaks with detectable levels of either histone modification in any cell state were assigned physiological enhancers, while ATAC\_up peaks without detectable enrichment of enhancer modifications were assigned cryptic enhancers. **(D)** Venn diagrams showing overlaps between cryptic and physiological enhancers with H3K9me3 enrichment (SETDB1 targets). **(E)** Heatmap and cumulative coverage plots showing ATAC and H3K9me3 coverage for ATAC\_up peaks without H3K9me3 enrichment corresponding to cryptic and physiological enhancers. Distance from the peak center is given in bp.

**A**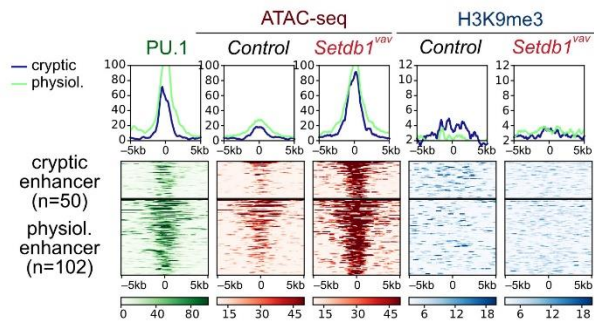**C**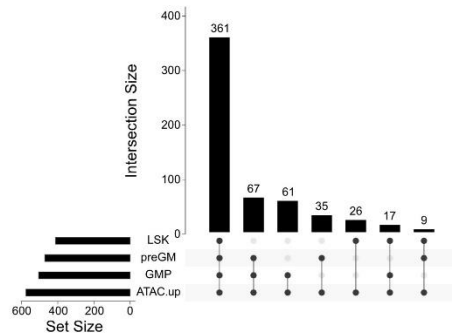**E**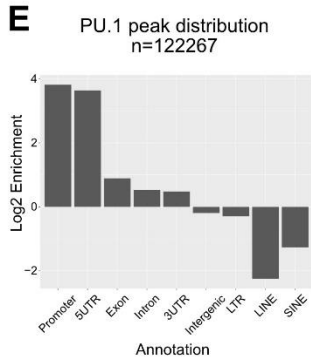**F**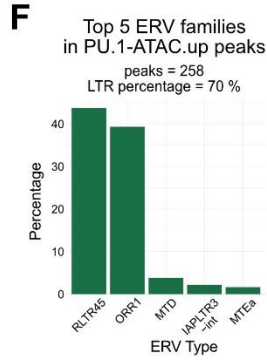**B**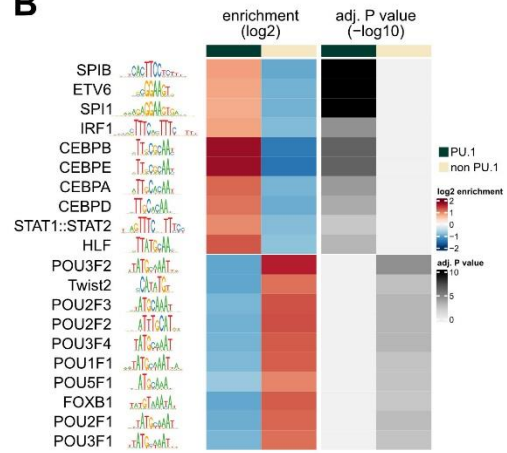**D**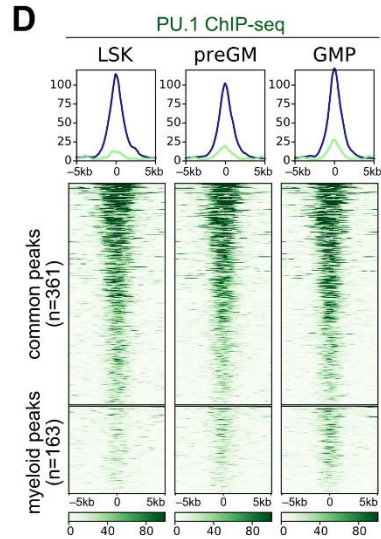**G**

Setdb1 targets (H3K9me3 pos.)

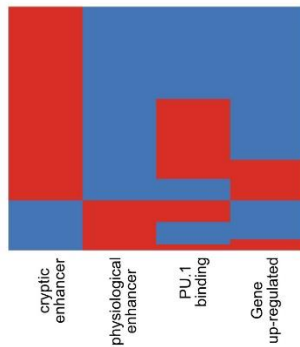

non Setdb1 targets (H3K9me3 neg.)

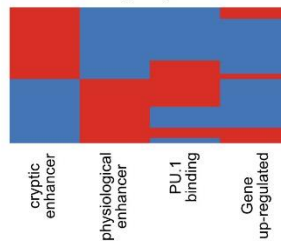

**Fig. S7. Connections between ATAC\_up peaks and PU.1 binding**

**(A)** Heatmap and cumulative coverage plots of ATAC\_up peaks without H3K9me3 enrichment overlapping with PU.1 peaks in LSK cells (3) showing PU.1 binding, ATAC-seq, and H3K9me3 ChIP-seq coverage. Distance from the peak center is given in bp. **(B)** monaLisa analysis of PU.1 enriched vs. non-PU.1 enriched ATAC\_up peaks. Heatmap displays motifs, motif enrichment, and adjusted p-value. **(C)** UpSet plot showing overlaps between ATAC\_up peaks and PU.1 binding in LSK, preGM, and GMP cells. **(D)** Heatmap and cumulative coverage plots of PU.1 binding in ATAC\_up peaks that are common or myeloid-specific as defined in (C). **(E)** Enrichment of genomic features in PU.1 peaks. **(F)** Association of ATAC\_up peaks overlapping with PU.1 binding with ERV families. Bar plot shows the proportion of ATAC\_up peaks overlapping with ERVs. **(G)** Heatmaps showing connections between cryptic and physiological enhancers, PU.1 binding, and up-regulated genes in the vicinity of these regions. Red – feature present; Blue – feature absent.



**A**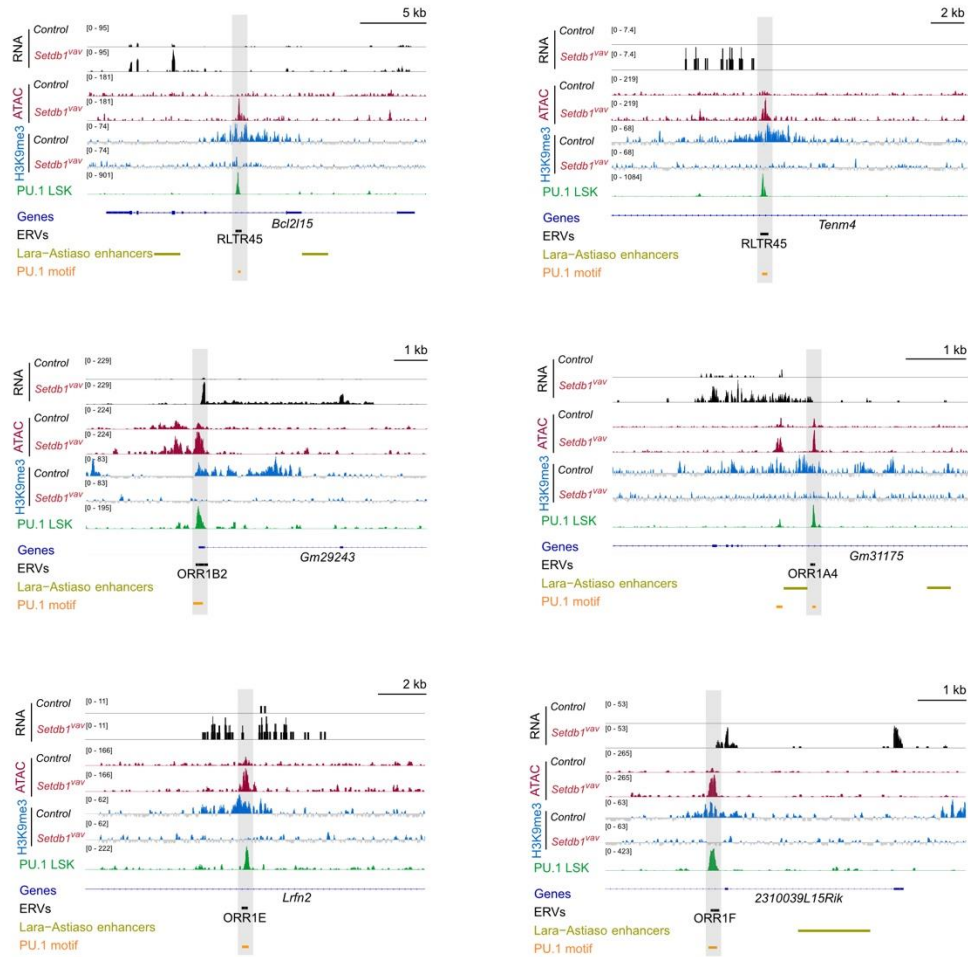**Fig. S8. SETDB1-dependent expression changes**

(A) Genome browser view of SETDB1-dependent expression changes on genes along with ATAC-seq and H3K9me3 coverage. PU.1 binding profile is based on (3).

**Table S1: Antibodies**

| Antibody                         | Clone    | Fluorochrome        | Provider                  | Identifier      |              |            |
|----------------------------------|----------|---------------------|---------------------------|-----------------|--------------|------------|
| Anti-mouse CD117                 | 2B8      | APC-Alexa Fluor 780 | Thermo Fischer Scientific | Cat# 47-1171-80 |              |            |
| Anti-mouse CD127(IL7R $\alpha$ ) | A7R34    | PE-Cy5              | Thermo Fischer Scientific | Cat# 15-1271-81 |              |            |
| Anti-mouse CD150                 | mShad150 | APC                 | Thermo Fischer Scientific | Cat# 17-1502-80 |              |            |
| Anti-mouse CD150                 | mShad150 | FITC                | Thermo Fischer Scientific | Cat# 11-1502-80 |              |            |
| Anti-mouse CD16/32               | 93       | PE-Cy7              | Thermo Fischer Scientific | Cat# 25-0161-81 |              |            |
| Anti-mouse CD34                  | RAM34    | eFluor 660          | Thermo Fischer Scientific | Cat# 50-0341-82 |              |            |
| Anti-mouse CD3e                  | 145-2C11 | APC-eFluor 780      | Thermo Fischer Scientific | Cat# 47-0031-80 |              |            |
| Anti-mouse CD45.1                | A20      | PE-Cy7              | Thermo Fischer Scientific | Cat# 25-0453-81 |              |            |
| Anti-mouse CD45.2                | 104      | FITC                | Thermo Fischer Scientific | Cat# 11-0454-81 |              |            |
| Anti-mouse CD45R/B220            | RA3-SB2  | APC-Alexa-Fluor 750 | Thermo Fischer Scientific | Cat# 27-0452-82 |              |            |
| Anti-mouse CD48                  | HM48-1   | PE-Cy7              | Thermo Fischer Scientific | Cat# 25-0481-80 |              |            |
| Anti-mouse CD62L                 | MEL-14   | FITC                | Thermo Fischer Scientific | Cat# 11-0621-82 |              |            |
| Anti-mouse CD71                  | R17217   | PE                  | Thermo Fischer Scientific | Cat# 12-0711-81 |              |            |
| Anti-mouse CD8a                  | 53-6.7   | PE-Cy7              | Thermo Fischer Scientific | Cat# 25-0081-81 |              |            |
| Anti-mouse Ki67                  | SolA15   | eFluor 450          | Thermo Fischer Scientific | Cat# 48-5698-80 |              |            |
| Anti-mouse Ly-6G(Gr-1)           | RB6-8C5  | PE                  | Thermo Fischer Scientific | Cat# 12-5931-81 |              |            |
| Anti-mouse Sca-1                 | D7       | FITC                | Thermo Fischer Scientific | Cat# 11-5981-81 |              |            |
| Anti-mouse Sca-1                 | D7       | PerCP-Cyanine 5.5   | Thermo Fischer Scientific | Cat# 45 5981-80 |              |            |
| Anti-mouse Ter119                | TER119   | APC-AlexaFluor 780  | Thermo Fischer Scientific | Cat# 47-5921-80 |              |            |
| Anti-mouse Ter119                | Ter-119  | PE                  | Thermo Fischer Scientific | Cat# 12-5921-81 |              |            |
| Anti-mouse CD11b/Mac-1           | M1/70    | PE                  | BD Bioscience             | Cat# 553311     |              |            |
| Anti-mouse CD11c                 | HL3      | PE                  | BD Bioscience             | Cat# 553802     |              |            |
| Anti-mouse CD127(IL7R $\alpha$ ) | SB/199   | BV421               | BD Bioscience             | Cat# 566300     |              |            |
| Anti-mouse CD19                  | 1D3      | PE                  | BD Bioscience             | Cat# 553786     |              |            |
| Anti-mouse CD3e                  | 145-2C11 | PE                  | BD Bioscience             | Cat# 553064     |              |            |
| Anti-mouse CD4                   | PM4-5    | PE                  | BD Bioscience             | Cat# 553049     |              |            |
| Anti-mouse CD45R/B220            | RA3-6B2  | PE                  | BD Bioscience             | Cat# 561878     |              |            |
| Anti-mouse CD49d (VLA-4)         | R1-2     | BV786               | BD Bioscience             | Cat# 564397     |              |            |
| Anti-mouse CD8a                  | 53-6.7   | PE                  | BD Bioscience             | Cat# 553033     |              |            |
| Mouse BD Fc Block                | 2.4G2    | purified            | BD Bioscience             | Cat# 553142     |              |            |
| <b>ChIP antibody</b>             |          |                     |                           |                 |              |            |
| Target                           | ID       | Weight              | Host                      | Type            | Provider     | Identifier |
| H3K9me3                          | 249      | 17 kDa              | rabbit                    | polyclonal      | Active Motif | 39161      |

**Table S2: Markers for cell definition**

| Cell population                 | Gating strategy                                                                                                           |
|---------------------------------|---------------------------------------------------------------------------------------------------------------------------|
| LT-HSC                          | Living cells, Lin <sup>-</sup> , Sca-1 <sup>+</sup> , c-kit <sup>+</sup> , CD150 <sup>+</sup> , CD48 <sup>-</sup>         |
| MPP                             | Living cells, Lin <sup>-</sup> , Sca-1 <sup>+</sup> , c-kit <sup>+</sup> , CD150 <sup>-</sup> , CD48 <sup>+</sup>         |
| LSK                             | Living cells, Lin <sup>-</sup> , Sca-1 <sup>+</sup> , c-kit <sup>+</sup>                                                  |
| CLP                             | Living cells, Lin <sup>-</sup> , IL7R $\alpha$ <sup>+</sup> , Sca-1 <sup>low</sup> , c-kit <sup>low</sup>                 |
| CMP                             | Living cells, Lin <sup>-</sup> , c-kit <sup>high</sup> , Sca-1 <sup>-</sup> , CD34 <sup>+</sup> , CD16/32 <sup>-low</sup> |
| MEP                             | Living cells, Lin <sup>-</sup> , c-kit <sup>high</sup> , Sca-1 <sup>-</sup> , CD34 <sup>-</sup> , CD16/32 <sup>-</sup>    |
| GMP                             | Living cells, Lin <sup>-</sup> , c-kit <sup>high</sup> , Sca-1 <sup>-</sup> , CD34 <sup>+</sup> , CD16/32 <sup>+</sup>    |
| B cell                          | Living cells, Lymphocyte, CD19 <sup>+</sup> , B220 <sup>+</sup>                                                           |
| DN1                             | Living cells, CD44 <sup>+</sup> , CD25 <sup>-</sup>                                                                       |
| DN2                             | Living cells, CD44 <sup>+</sup> , CD25 <sup>+</sup>                                                                       |
| DN3                             | Living cells, CD44 <sup>+</sup> , CD25 <sup>+</sup>                                                                       |
| DN4                             | Living cells, CD44 <sup>+</sup> , CD25 <sup>-</sup>                                                                       |
| DP                              | Living cells, CD3 <sup>+</sup> , CD4 <sup>+</sup> , CD8 <sup>+</sup>                                                      |
| SP CD4                          | Living cells, CD3 <sup>+</sup> , CD4 <sup>+</sup> , CD8 <sup>-</sup>                                                      |
| SP CD8                          | Living cells, CD3 <sup>+</sup> , CD4 <sup>-</sup> , CD8 <sup>+</sup>                                                      |
| ProE                            | Living cells, CD71 <sup>+</sup> , TER119 <sup>-</sup>                                                                     |
| TER119 erythroblasts            | Living cells, CD71 <sup>+</sup> , TER119 <sup>+</sup>                                                                     |
| Granulocyte/Macrophage/Monocyte | Living cells, Gr-1 <sup>+</sup> , Mac-1 <sup>+</sup>                                                                      |

**Table S3: Reagents and commercial assays**

| Reagent/Commercial assay                              | Provider                  | Identifier       |
|-------------------------------------------------------|---------------------------|------------------|
| Agencourt AMPure XP                                   | Beckman Coulter           | Cat# A63882      |
| Agilent High Sensitivity DNA Kit                      | Agilent                   | Cat# 5067-4626   |
| Agilent RNA 6000 Pico Kit                             | Agilent                   | Cat# 5067-1513   |
| Annexin V Apoptosis Detection Kit FITC                | Thermo Fischer Scientific | Cat# 88-8005-72  |
| Anti-PE MicroBeads                                    | Miltenyi                  | Cat# 130-048-801 |
| Arcturus® PicoPure® RNA Isolation Kit                 | Thermo Fischer Scientific | Cat# KIT0204     |
| CellTrace CFSE Cell Proliferation Kit                 | Thermo Fischer Scientific | Cat# C34570      |
| cOmplete, Mini, EDTA-free Protease Inhibitor Cocktail | Roche Diagnostics         | Cat# 4693159001  |
| Digitonin                                             | Promega                   | Cat# G9441       |
| Dynabeads Protein A/Protein G                         | Thermo Fischer Scientific | Cat# 10015D      |
| Elution Buffer (EB)                                   | Qiagen                    | Cat# 19086       |
| Foxp3 / Transcription Factor Staining Buffer Set      | Thermo Fischer Scientific | Cat# 00-5523-00  |
| Methocult M3434                                       | STEMCELL Technologies     | Cat# 03434       |
| Methocult M3630                                       | STEMCELL Technologies     | Cat# 03630       |
| MicroPlex Library Preparation Kit v2                  | Diagenode                 | Cat# C05010012   |
| MNase                                                 | Biolabs                   | Cat# M0247S      |
| Nextera DNA Library Preparation Kit                   | Illumina                  | Cat# FC-121-1030 |
| Nuclei Isolation Kit: Nuclei EZ Prep                  | Sigma                     | Cat# NUC-101     |
| Osteosoft                                             | Merck                     | Cat# 101728      |
| PCR clean-up MinElute kit                             | Qiagen                    | Cat# 28006       |
| Qubit dsDNA HS Assay kit                              | Thermo Fischer Scientific | Cat# Q33854      |
| red blood cell lysis buffer                           | BD Bioscience             | Cat# 555899      |
| RNase-Free DNase Set                                  | Qiagen                    | Cat# 79254       |
| SMART-Seq v4 Ultra Low Input RNA Kit                  | Clontech                  | Cat# 634888      |
| Zombie Aqua Fixable Viability Dye                     | BioLegend                 | Cat# 423101      |

**Table S4: NGS libraries**

| Library Name          | ID    | Experiment    | Sequencing mode  | Index    |
|-----------------------|-------|---------------|------------------|----------|
| LT-HSC_Con2           | GS98  | RNA-seq       | 50 bp paired-end | ATCACG   |
| LT-HSC_Con3           | GS99  | RNA-seq       | 50 bp paired-end | CGATGT   |
| LT-HSC_Con4           | GS100 | RNA-seq       | 50 bp paired-end | TTAGGC   |
| LT-HSC_Mut-1          | GS101 | RNA-seq       | 50 bp paired-end | TGACCA   |
| LT-HSC_Mut-3          | GS102 | RNA-seq       | 50 bp paired-end | ACAGTG   |
| LT-HSC_Mut-4          | GS103 | RNA-seq       | 50 bp paired-end | GCCAAT   |
| MPP_Con1              | GS104 | RNA-seq       | 50 bp paired-end | CAGATC   |
| MPP_Con2              | GS105 | RNA-seq       | 50 bp paired-end | ACTTGA   |
| MPP_Con3              | GS106 | RNA-seq       | 50 bp paired-end | GATCAG   |
| MPP_Mut-1             | GS107 | RNA-seq       | 50 bp paired-end | TAGCTT   |
| MPP_Mut-2             | GS108 | RNA-seq       | 50 bp paired-end | GGCTAC   |
| MPP_Mut-4             | GS109 | RNA-seq       | 50 bp paired-end | CTTGTA   |
| LSK_Input_con_1       | GS353 | ULI-NChIP-seq | 50 bp single-end | ATCACG   |
| LSK_H3K9me3_con_1     | GS344 | ULI-NChIP-seq | 50 bp single-end | CGATGT   |
| LSK_H3K9me3_con_2     | GS229 | ULI-NChIP-seq | 50 bp single-end | CGATGT   |
| LSK_H3K9me3_con_3     | GS346 | ULI-NChIP-seq | 50 bp single-end | GCCAAT   |
| LSK_H3K9me3_mut_1     | GS345 | ULI-NChIP-seq | 50 bp single-end | TTAGGC   |
| LSK_H3K9me3_mut_2     | GS352 | ULI-NChIP-seq | 50 bp single-end | ACAGTG   |
| LSK_H3K9me3_mut_3     | GS347 | ULI-NChIP-seq | 50 bp single-end | CAGATC   |
| FL_LSK_con1_Omni-ATAC | GS472 | Omni-ATAC-seq | 50 bp single-end | GCTACGCT |
| FL_LSK_con2_Omni-ATAC | GS444 | Omni-ATAC-seq | 50 bp single-end | AGGCAGAA |
| FL_LSK_mut1_Omni-ATAC | GS473 | Omni-ATAC-seq | 50 bp single-end | CGAGGCTG |
| FL_LSK_mut2_Omni-ATAC | GS445 | Omni-ATAC-seq | 50 bp single-end | CGAGGCTG |

**Table S5: Genes significantly upregulated in *Setdb1*<sup>av</sup> LT-HSCs**

| gene          | baseMean    | log2FoldChange | lfcSE      | stat      | pvalue   | padj     |
|---------------|-------------|----------------|------------|-----------|----------|----------|
| Magea13       | 255.443892  | 3.91226304     | 0.19643763 | 14.321552 | 1.60E-46 | 5.81E-43 |
| Iqcg          | 287.272926  | 3.05452084     | 0.18559501 | 15.868804 | 1.04E-56 | 5.03E-53 |
| Stag3         | 1405.794399 | 2.96320513     | 0.14616343 | 20.180222 | 1.46E-90 | 2.11E-86 |
| Dnah8         | 1156.891857 | 2.43437381     | 0.12855484 | 18.871677 | 1.95E-79 | 1.41E-75 |
| Tmem150c      | 79.504009   | 2.3214372      | 0.20866722 | 7.200562  | 6.00E-13 | 3.94E-10 |
| Akap5         | 151.113252  | 2.2954194      | 0.20506166 | 11.110825 | 1.11E-28 | 1.61E-25 |
| M1ap          | 484.265603  | 2.25293503     | 0.18157802 | 12.381931 | 3.27E-35 | 7.90E-32 |
| 1700097N02Rik | 366.951065  | 2.13473463     | 0.18728389 | 11.37589  | 5.51E-30 | 9.98E-27 |
| Fcgr2b        | 330.552619  | 2.12454222     | 0.20874961 | 11.328495 | 9.48E-30 | 1.52E-26 |
| 2810474O19Rik | 3390.548825 | 1.93852159     | 0.15016093 | 12.911049 | 3.90E-38 | 1.13E-34 |
| Gstp2         | 160.178937  | 1.68153886     | 0.20842234 | 8.635023  | 5.87E-18 | 7.08E-15 |
| Meioc         | 157.803667  | 1.65184762     | 0.20174505 | 7.675555  | 1.65E-14 | 1.40E-11 |
| Car1          | 5570.616251 | 1.51888416     | 0.20014001 | 11.862318 | 1.86E-32 | 3.84E-29 |
| Cldn10        | 75.734083   | 1.45283395     | 0.20865305 | 7.036914  | 1.97E-12 | 1.14E-09 |
| Amot1         | 72.14265    | 1.43147296     | 0.20387799 | 7.666442  | 1.77E-14 | 1.42E-11 |
| Gstp1         | 2152.671706 | 1.40856093     | 0.15182173 | 9.277802  | 1.73E-20 | 2.28E-17 |
| Entpd3        | 40.988717   | 1.27476849     | 0.19673728 | 6.659554  | 2.75E-11 | 1.42E-08 |
| Slc1a4        | 482.573921  | 1.23794086     | 0.19432793 | 6.386418  | 1.70E-10 | 7.45E-08 |
| Ldoc1l        | 452.503309  | 1.23520375     | 0.17539496 | 7.039409  | 1.93E-12 | 1.14E-09 |
| Def8          | 4929.919785 | 1.21784481     | 0.15543229 | 7.837245  | 4.61E-15 | 4.17E-12 |
| Arl14epl      | 32.508212   | 1.14781722     | 0.19016589 | 6.491304  | 8.51E-11 | 3.85E-08 |
| 4930447C04Rik | 382.551671  | 1.13766289     | 0.19646058 | 5.805384  | 6.42E-09 | 2.11E-06 |
| Gapt          | 203.319914  | 1.1132987      | 0.18953193 | 5.871636  | 4.32E-09 | 1.45E-06 |
| Klr1c         | 153.227214  | 1.09468584     | 0.20429564 | 5.382096  | 7.36E-08 | 1.97E-05 |
| 4930526115Rik | 241.494179  | 1.08501191     | 0.20717535 | 5.29028   | 1.22E-07 | 2.98E-05 |
| Ccdc36        | 112.457841  | 1.04715475     | 0.20532129 | 5.120434  | 3.05E-07 | 6.39E-05 |
| Alyref2       | 180.660008  | 1.04393917     | 0.18457833 | 5.647978  | 1.62E-08 | 5.00E-06 |
| Ryr2          | 75.216236   | 1.0355964      | 0.20873744 | 5.011592  | 5.40E-07 | 1.09E-04 |
| Pkd1l3        | 68.589833   | 1.01737463     | 0.2081999  | 4.908146  | 9.19E-07 | 1.68E-04 |
| C1rl          | 730.183064  | 1.01268793     | 0.16693859 | 6.065563  | 1.31E-09 | 4.88E-07 |
| Zcwpw1        | 375.548056  | 1.00419496     | 0.16520607 | 6.074028  | 1.25E-09 | 4.75E-07 |
| Dmc1          | 104.838371  | 0.98371019     | 0.20414146 | 4.826925  | 1.39E-06 | 2.45E-04 |
| Dzip1         | 132.121506  | 0.97594868     | 0.20796499 | 4.734001  | 2.20E-06 | 3.62E-04 |
| Slc16a3       | 1162.807003 | 0.97411192     | 0.18503253 | 5.270051  | 1.36E-07 | 3.14E-05 |
| D330045A20Rik | 92.206377   | 0.95352279     | 0.20870374 | 4.636378  | 3.55E-06 | 5.58E-04 |
| Prr19         | 37.544232   | 0.93537032     | 0.20037275 | 4.909571  | 9.13E-07 | 1.68E-04 |
| Tex15         | 74.889019   | 0.9319548      | 0.18949118 | 5.874347  | 4.25E-09 | 1.45E-06 |
| Il1rl1        | 150.715209  | 0.92350896     | 0.2055335  | 4.509114  | 6.51E-06 | 9.24E-04 |
| Nrg4          | 188.551232  | 0.92274335     | 0.20494394 | 4.520514  | 6.17E-06 | 8.84E-04 |
| Ccbl2         | 541.191988  | 0.91384198     | 0.17344768 | 5.269568  | 1.37E-07 | 3.14E-05 |
| Tmem132d      | 36.787472   | 0.90442472     | 0.18708119 | 5.594943  | 2.21E-08 | 6.52E-06 |
| Slc25a31      | 22.63805    | 0.88531814     | 0.18979648 | 5.029432  | 4.92E-07 | 1.00E-04 |
| 4930539E08Rik | 53.381508   | 0.88075998     | 0.20605221 | 4.372692  | 1.23E-05 | 1.54E-03 |
| Al506816      | 199.747206  | 0.87295248     | 0.19608176 | 4.454109  | 8.42E-06 | 1.14E-03 |
| Akr1c13       | 500.162217  | 0.8534203      | 0.15873709 | 5.375031  | 7.66E-08 | 2.01E-05 |
| Rnf17         | 342.525776  | 0.84962577     | 0.20536135 | 4.156852  | 3.23E-05 | 3.62E-03 |
| Crispld2      | 361.701669  | 0.82653131     | 0.18592153 | 4.446959  | 8.71E-06 | 1.17E-03 |
| Gal3st3       | 43.084192   | 0.82035737     | 0.19040549 | 4.778267  | 1.77E-06 | 3.05E-04 |
| Akap2         | 34.753933   | 0.80739374     | 0.20497151 | 4.006668  | 6.16E-05 | 6.23E-03 |
| Zfp709        | 216.664257  | 0.80374616     | 0.1809703  | 4.438546  | 9.06E-06 | 1.20E-03 |
| 1700001L05Rik | 168.440655  | 0.80027346     | 0.2028753  | 3.951596  | 7.76E-05 | 7.34E-03 |
| Pcdhga12      | 77.556453   | 0.7909819      | 0.20878042 | 3.81509   | 1.36E-04 | 1.10E-02 |
| Espnl         | 51.866306   | 0.78770911     | 0.2037334  | 3.971345  | 7.15E-05 | 6.90E-03 |
| Hsh2d         | 391.530922  | 0.78424511     | 0.17299579 | 4.532843  | 5.82E-06 | 8.51E-04 |
| Ly6c1         | 36.512204   | 0.77958271     | 0.19869699 | 4.090409  | 4.31E-05 | 4.72E-03 |
| Mical2        | 194.215177  | 0.77913449     | 0.19425818 | 4.013209  | 5.99E-05 | 6.11E-03 |
| Afap1         | 74.85081    | 0.77826478     | 0.20432842 | 3.8092    | 1.39E-04 | 1.11E-02 |
| Gpc2          | 251.915388  | 0.77243878     | 0.16343089 | 4.72341   | 2.32E-06 | 3.73E-04 |
| Setx          | 1744.23535  | 0.77002243     | 0.14561667 | 5.287996  | 1.24E-07 | 2.98E-05 |
| 1700030C10Rik | 99.581071   | 0.76140523     | 0.20872912 | 3.672047  | 2.41E-04 | 1.70E-02 |
| Skint3        | 79.464851   | 0.75893565     | 0.20756442 | 3.710488  | 2.07E-04 | 1.51E-02 |
| Pla2g5        | 18.915604   | 0.75783223     | 0.17068315 | 5.580133  | 2.40E-08 | 6.96E-06 |
| Ahsa2         | 886.628337  | 0.74579887     | 0.14029963 | 5.314843  | 1.07E-07 | 2.66E-05 |
| Ttc39b        | 681.499997  | 0.72498535     | 0.15566518 | 4.656681  | 3.21E-06 | 5.11E-04 |
| Erdr1         | 280.126236  | 0.72139105     | 0.20452258 | 3.629982  | 2.83E-04 | 1.93E-02 |
| Alpl          | 92.145693   | 0.7137502      | 0.20720178 | 3.502408  | 4.61E-04 | 2.84E-02 |
| Gm13154       | 63.290205   | 0.71267247     | 0.20842036 | 3.428791  | 6.06E-04 | 3.50E-02 |
| Catsperg1     | 106.002561  | 0.70364025     | 0.19680271 | 3.574283  | 3.51E-04 | 2.26E-02 |

|               |             |            |            |          |          |          |
|---------------|-------------|------------|------------|----------|----------|----------|
| B3gnt7        | 405.739699  | 0.70266079 | 0.16122981 | 4.357118 | 1.32E-05 | 1.60E-03 |
| Vmn2r96       | 24.159363   | 0.69160109 | 0.16564514 | 5.711345 | 1.12E-08 | 3.53E-06 |
| Zfp110        | 1121.151946 | 0.68804101 | 0.1294443  | 5.314812 | 1.07E-07 | 2.66E-05 |
| Pcdhgb4       | 88.708836   | 0.68505956 | 0.20541956 | 3.397567 | 6.80E-04 | 3.80E-02 |
| Fbp1          | 43.254192   | 0.6781096  | 0.19547288 | 3.636825 | 2.76E-04 | 1.89E-02 |
| Ltbp1         | 139.342763  | 0.6746406  | 0.2014961  | 3.458683 | 5.43E-04 | 3.17E-02 |
| Sdsl          | 76.13298    | 0.67177386 | 0.20287425 | 3.393298 | 6.91E-04 | 3.84E-02 |
| Kirrel2       | 15.774965   | 0.6618209  | 0.16367434 | 5.280192 | 1.29E-07 | 3.06E-05 |
| Zc3hav1l      | 314.784676  | 0.65717529 | 0.17340558 | 3.788624 | 1.51E-04 | 1.20E-02 |
| Fam208a       | 619.876027  | 0.65195806 | 0.16895591 | 3.858411 | 1.14E-04 | 9.95E-03 |
| Mtl5          | 63.694551   | 0.64635484 | 0.19530953 | 3.464246 | 5.32E-04 | 3.12E-02 |
| Pxt1          | 28.988235   | 0.64588508 | 0.19908316 | 3.31969  | 9.01E-04 | 4.71E-02 |
| Ecm1          | 1049.563095 | 0.64537822 | 0.16825535 | 3.836173 | 1.25E-04 | 1.05E-02 |
| Zfp808        | 321.693253  | 0.64277975 | 0.15963417 | 4.025207 | 5.69E-05 | 5.86E-03 |
| Gdf3          | 266.059556  | 0.64211678 | 0.17785653 | 3.610295 | 3.06E-04 | 2.04E-02 |
| Hyou1         | 759.320218  | 0.64155368 | 0.16191474 | 3.962428 | 7.42E-05 | 7.11E-03 |
| Scml4         | 384.776296  | 0.63985857 | 0.19347652 | 3.308621 | 9.38E-04 | 4.83E-02 |
| Tdrkh         | 554.084503  | 0.63865777 | 0.16451983 | 3.881931 | 1.04E-04 | 9.24E-03 |
| 2610305D13Rik | 356.043352  | 0.63320556 | 0.19227102 | 3.295655 | 9.82E-04 | 4.99E-02 |
| Plcd3         | 32.704786   | 0.63313914 | 0.19481719 | 3.379692 | 7.26E-04 | 4.02E-02 |
| Frdm6         | 492.023553  | 0.63275438 | 0.17050529 | 3.710743 | 2.07E-04 | 1.51E-02 |
| Ept1          | 573.026286  | 0.6299149  | 0.1594849  | 3.949316 | 7.84E-05 | 7.37E-03 |
| Aim2          | 552.331834  | 0.62619114 | 0.17138168 | 3.653999 | 2.58E-04 | 1.79E-02 |
| Sema4f        | 50.977002   | 0.62066967 | 0.19549825 | 3.300122 | 9.66E-04 | 4.94E-02 |
| Fbp2          | 202.17511   | 0.61379998 | 0.15920801 | 7.160053 | 8.06E-13 | 5.07E-10 |
| Gadd45g       | 235.319201  | 0.61311868 | 0.1792034  | 3.420641 | 6.25E-04 | 3.57E-02 |
| Cnr2          | 559.245883  | 0.60904949 | 0.15692885 | 3.880914 | 1.04E-04 | 9.24E-03 |
| Adad2         | 12.715649   | 0.60027951 | 0.16053591 | 4.345901 | 1.39E-05 | 1.67E-03 |
| Ncf1          | 675.588019  | 0.59481666 | 0.17861582 | 3.331103 | 8.65E-04 | 4.57E-02 |
| Macrod2       | 346.529623  | 0.58665848 | 0.15381247 | 3.813437 | 1.37E-04 | 1.10E-02 |
| Epha2         | 24.572881   | 0.58236394 | 0.1758981  | 3.678915 | 2.34E-04 | 1.68E-02 |
| Sh2d5         | 215.64213   | 0.57825578 | 0.1730108  | 3.340995 | 8.35E-04 | 4.46E-02 |
| Tex19.1       | 546.048641  | 0.57550772 | 0.15563464 | 8.186358 | 2.69E-16 | 2.78E-13 |
| Cep70         | 691.712079  | 0.56873458 | 0.13793961 | 4.122658 | 3.75E-05 | 4.14E-03 |
| Morc2a        | 905.086842  | 0.56428549 | 0.15363233 | 3.672653 | 2.40E-04 | 1.70E-02 |
| Smc5          | 3572.585429 | 0.54859882 | 0.10729779 | 5.112802 | 3.17E-07 | 6.56E-05 |
| Uqcc2         | 1326.123245 | 0.5434979  | 0.13369201 | 4.065244 | 4.80E-05 | 5.09E-03 |
| Gm13157       | 535.60155   | 0.54324844 | 0.13959749 | 3.891165 | 9.98E-05 | 9.07E-03 |
| Tex19.2       | 15.378277   | 0.53885116 | 0.15691992 | 4.16912  | 3.06E-05 | 3.48E-03 |
| H2-T23        | 2307.497992 | 0.53685487 | 0.14674943 | 3.658395 | 2.54E-04 | 1.77E-02 |
| Trap1a        | 1097.053648 | 0.52944868 | 0.15164413 | 8.131168 | 4.25E-16 | 4.10E-13 |
| Ly6k          | 19.390029   | 0.52356629 | 0.15217831 | 4.584245 | 4.56E-06 | 6.94E-04 |
| Olfir1372-ps1 | 18.969776   | 0.52195242 | 0.15080716 | 5.185252 | 2.16E-07 | 4.59E-05 |
| Tmem184b      | 628.485714  | 0.51894215 | 0.13885906 | 3.736731 | 1.86E-04 | 1.40E-02 |
| Sync          | 14.67601    | 0.51766985 | 0.1625647  | 3.692288 | 2.22E-04 | 1.60E-02 |
| Chrb4         | 31.227441   | 0.51325263 | 0.16872671 | 3.47007  | 5.20E-04 | 3.07E-02 |
| Vill          | 2335.577876 | 0.50953625 | 0.11823148 | 4.309519 | 1.64E-05 | 1.96E-03 |
| Clstn3        | 2056.573937 | 0.5071999  | 0.14432647 | 3.514227 | 4.41E-04 | 2.74E-02 |
| Arhgap30      | 2243.379433 | 0.50497001 | 0.14036584 | 3.597585 | 3.21E-04 | 2.11E-02 |
| Nccrp1        | 10.61331    | 0.50112984 | 0.15092135 | 4.024524 | 5.71E-05 | 5.86E-03 |
| Pfkl          | 989.025056  | 0.50012056 | 0.13314498 | 3.756083 | 1.73E-04 | 1.31E-02 |
| Sfn4          | 16.253304   | 0.49968218 | 0.14854267 | 4.996294 | 5.84E-07 | 1.16E-04 |
| F11r          | 1326.354052 | 0.49427955 | 0.14934877 | 3.309591 | 9.34E-04 | 4.83E-02 |
| St6galnac3    | 477.429939  | 0.49404679 | 0.13858878 | 3.564528 | 3.65E-04 | 2.33E-02 |
| Padi3         | 220.787559  | 0.47657343 | 0.15831296 | 3.844068 | 1.21E-04 | 1.04E-02 |
| Klh6          | 2728.955394 | 0.47395349 | 0.12608981 | 3.758852 | 1.71E-04 | 1.31E-02 |
| Ethel         | 962.827767  | 0.46944334 | 0.12529242 | 3.746578 | 1.79E-04 | 1.36E-02 |
| Ppa1          | 1828.979226 | 0.45154397 | 0.13637817 | 3.311004 | 9.30E-04 | 4.83E-02 |
| Gabbr1        | 11.001119   | 0.43916735 | 0.14177783 | 4.530549 | 5.88E-06 | 8.51E-04 |
| Ppef1         | 14.552503   | 0.41006352 | 0.14108345 | 3.820551 | 1.33E-04 | 1.10E-02 |
| Ankrd36       | 9.834425    | 0.40929274 | 0.14215315 | 3.479822 | 5.02E-04 | 3.00E-02 |
| Cyp2b10       | 13.131999   | 0.39875897 | 0.13660528 | 4.565828 | 4.98E-06 | 7.42E-04 |
| Fmr1nb        | 15.659048   | 0.39526754 | 0.14181825 | 3.668574 | 2.44E-04 | 1.71E-02 |
| 1700029P11Rik | 7.900071    | 0.36261379 | 0.13173963 | 4.053408 | 5.05E-05 | 5.26E-03 |
| Ntnq1         | 7.055213    | 0.34009188 | 0.13135398 | 3.338586 | 8.42E-04 | 4.46E-02 |
| Dppa4         | 13.899712   | 0.33673336 | 0.13392516 | 3.339528 | 8.39E-04 | 4.46E-02 |
| Tuba3a        | 11.756002   | 0.32301932 | 0.12726473 | 3.677581 | 2.35E-04 | 1.68E-02 |
| 2310043L19Rik | 7.927234    | 0.31033314 | 0.12621337 | 3.342659 | 8.30E-04 | 4.45E-02 |
| Ccl12         | 14.377147   | 0.30487065 | 0.12418268 | 3.771932 | 1.62E-04 | 1.25E-02 |
| Fcrib         | 7.460955    | 0.29110436 | 0.12052145 | 3.765698 | 1.66E-04 | 1.28E-02 |

|        |           |            |            |          |          |          |
|--------|-----------|------------|------------|----------|----------|----------|
| Cdsn   | 6.136405  | 0.29059951 | 0.12044486 | 3.619434 | 2.95E-04 | 1.99E-02 |
| Capn11 | 11.410019 | 0.2707337  | 0.11857808 | 3.477275 | 5.07E-04 | 3.02E-02 |
| Tcfl5  | 9.384256  | 0.26929407 | 0.11865486 | 3.328959 | 8.72E-04 | 4.59E-02 |
| Ak7    | 98.237383 | 0.26917523 | 0.11818644 | 4.377602 | 1.20E-05 | 1.52E-03 |
| Prss42 | 7.648234  | 0.21011662 | 0.10495761 | 3.413385 | 6.42E-04 | 3.63E-02 |
| Mmp13  | 15.365767 | 0.03603977 | 0.04608085 | 5.335055 | 9.55E-08 | 2.47E-05 |

**Table S6:** Genes significantly downregulated in *Setdb1*<sup>Δvav</sup> LT-HSCs

| gene          | baseMean    | log2FoldChange | lfcSE     | stat      | pvalue   | padj     |
|---------------|-------------|----------------|-----------|-----------|----------|----------|
| Igf1          | 425.941256  | -1.5556759     | 0.1851376 | -8.40225  | 4.38E-17 | 4.88E-14 |
| Muc6          | 95.659654   | -1.513428      | 0.2071867 | -7.318294 | 2.51E-13 | 1.73E-10 |
| Igf2          | 1393.824195 | -1.4714635     | 0.1949422 | -7.590994 | 3.17E-14 | 2.42E-11 |
| Ces2b         | 100.011713  | -1.4415444     | 0.2047328 | -7.024418 | 2.15E-12 | 1.20E-09 |
| Plbd1         | 83.170428   | -1.3334879     | 0.2075579 | -6.715387 | 1.88E-11 | 1.01E-08 |
| H19           | 1598.410735 | -1.3284269     | 0.1782038 | -7.46223  | 8.51E-14 | 6.16E-11 |
| Clec1b        | 101.21703   | -1.3049536     | 0.2082363 | -6.51708  | 7.17E-11 | 3.46E-08 |
| Cd36          | 108.654841  | -1.3009417     | 0.2087819 | -6.378119 | 1.79E-10 | 7.63E-08 |
| Meg3          | 357.778493  | -1.298693      | 0.1978024 | -6.582702 | 4.62E-11 | 2.31E-08 |
| C6            | 35.216139   | -1.2898255     | 0.1959837 | -6.499298 | 8.07E-11 | 3.77E-08 |
| Tmem26        | 118.322552  | -1.2517557     | 0.2070247 | -6.091788 | 1.12E-09 | 4.49E-07 |
| Il18bp        | 289.299225  | -1.2217478     | 0.2028804 | -6.060889 | 1.35E-09 | 4.90E-07 |
| Gfra2         | 52.208587   | -1.2099955     | 0.2077384 | -5.952224 | 2.65E-09 | 9.34E-07 |
| Fcgrt         | 525.126826  | -1.0745087     | 0.1692687 | -6.34481  | 2.23E-10 | 9.21E-08 |
| Vldlr         | 38.902298   | -1.0373061     | 0.2047597 | -5.204119 | 1.95E-07 | 4.27E-05 |
| Pitx2         | 74.818756   | -1.014036      | 0.2079789 | -4.982615 | 6.27E-07 | 1.23E-04 |
| Plxna4os1     | 131.328724  | -1.0111203     | 0.2078564 | -4.910071 | 9.10E-07 | 1.68E-04 |
| Gimap3        | 182.090816  | -0.9962522     | 0.2049205 | -4.880551 | 1.06E-06 | 1.91E-04 |
| Cyp4b1        | 134.302033  | -0.9857281     | 0.1995577 | -4.935902 | 7.98E-07 | 1.52E-04 |
| Wfdc18        | 31.272367   | -0.9832358     | 0.1986185 | -5.206372 | 1.93E-07 | 4.27E-05 |
| S100a16       | 165.35317   | -0.9723587     | 0.2044095 | -4.768407 | 1.86E-06 | 3.16E-04 |
| Wfdc17        | 180.298103  | -0.9707684     | 0.2064128 | -4.734748 | 2.19E-06 | 3.62E-04 |
| Kcna2         | 22.307133   | -0.9521371     | 0.1834438 | -5.795422 | 6.81E-09 | 2.19E-06 |
| Syne4         | 108.535891  | -0.9516352     | 0.200373  | -4.743624 | 2.10E-06 | 3.53E-04 |
| Tac2          | 23.309428   | -0.9468217     | 0.1905944 | -5.221686 | 1.77E-07 | 4.01E-05 |
| Postn         | 295.938217  | -0.9452318     | 0.2005636 | -4.727118 | 2.28E-06 | 3.70E-04 |
| Plekhhg1      | 422.860269  | -0.9319419     | 0.1670245 | -5.574498 | 2.48E-08 | 7.04E-06 |
| Dhrs3         | 239.673433  | -0.9276352     | 0.1922848 | -4.8269   | 1.39E-06 | 2.45E-04 |
| Flt3          | 1464.376128 | -0.9075568     | 0.149377  | -6.074097 | 1.25E-09 | 4.75E-07 |
| Epb4.113      | 199.132192  | -0.9038017     | 0.1990437 | -4.548619 | 5.40E-06 | 7.97E-04 |
| Fxyd1         | 70.793994   | -0.8904782     | 0.2084212 | -4.284387 | 1.83E-05 | 2.16E-03 |
| Ctsh          | 510.597795  | -0.8705468     | 0.1980324 | -4.406782 | 1.05E-05 | 1.36E-03 |
| 3632451O06Rik | 83.792661   | -0.8443961     | 0.2016569 | -4.180864 | 2.90E-05 | 3.36E-03 |
| Jun           | 429.56836   | -0.8413209     | 0.15301   | -5.493238 | 3.95E-08 | 1.10E-05 |
| Fam132a       | 1061.373919 | -0.8324807     | 0.1864542 | -4.467428 | 7.92E-06 | 1.10E-03 |
| Efna1         | 252.099538  | -0.8314191     | 0.1938361 | -4.289321 | 1.79E-05 | 2.13E-03 |
| Aqp1          | 654.537921  | -0.8283186     | 0.1809568 | -4.578147 | 4.69E-06 | 7.07E-04 |
| Fpr1          | 35.991362   | -0.8249161     | 0.1871858 | -4.973822 | 6.56E-07 | 1.27E-04 |
| Lama3         | 24.344749   | -0.8202546     | 0.1928618 | -4.489535 | 7.14E-06 | 1.00E-03 |
| Nrk           | 184.358521  | -0.8192814     | 0.2065871 | -3.980772 | 6.87E-05 | 6.75E-03 |
| Mrap          | 106.844329  | -0.8179833     | 0.205948  | -4.083859 | 4.43E-05 | 4.78E-03 |
| Car3          | 69.516105   | -0.8137523     | 0.1858012 | -5.186138 | 2.15E-07 | 4.59E-05 |
| Epha7         | 62.36513    | -0.8125505     | 0.207659  | -3.97488  | 7.04E-05 | 6.84E-03 |
| Armcx4        | 161.063427  | -0.7958166     | 0.199852  | -3.981581 | 6.85E-05 | 6.75E-03 |
| Sqrdl         | 100.674422  | -0.7957601     | 0.205234  | -3.877921 | 1.05E-04 | 9.30E-03 |
| Lancl3        | 75.802869   | -0.7955882     | 0.2075572 | -3.837758 | 1.24E-04 | 1.05E-02 |
| Gem           | 1265.246778 | -0.7936787     | 0.1415986 | -5.603963 | 2.10E-08 | 6.32E-06 |
| Ndnf          | 54.19703    | -0.7655982     | 0.2022556 | -3.904467 | 9.44E-05 | 8.76E-03 |
| Bex2          | 109.902323  | -0.7482612     | 0.2059221 | -3.640114 | 2.73E-04 | 1.88E-02 |
| Trf           | 3178.874402 | -0.748031      | 0.2010852 | -3.901669 | 9.55E-05 | 8.81E-03 |
| Serpinf1      | 1217.870776 | -0.7460152     | 0.169078  | -4.41222  | 1.02E-05 | 1.33E-03 |
| Dkk1          | 88.423944   | -0.7417883     | 0.2020352 | -3.818911 | 1.34E-04 | 1.10E-02 |
| Sh2d4a        | 237.846297  | -0.7403581     | 0.2085354 | -3.575617 | 3.49E-04 | 2.26E-02 |
| Gpc3          | 178.154229  | -0.7333674     | 0.2078016 | -3.592066 | 3.28E-04 | 2.15E-02 |
| Gjb2          | 43.859642   | -0.7297818     | 0.1735191 | -5.453643 | 4.93E-08 | 1.35E-05 |
| Scd1          | 251.220966  | -0.7266717     | 0.2024402 | -3.59766  | 3.21E-04 | 2.11E-02 |
| Dlk1          | 827.548923  | -0.7258604     | 0.1962065 | -3.957765 | 7.57E-05 | 7.20E-03 |
| Cyp26b1       | 116.393815  | -0.7250747     | 0.1992633 | -3.634491 | 2.79E-04 | 1.90E-02 |

|           |             |            |           |           |          |          |
|-----------|-------------|------------|-----------|-----------|----------|----------|
| S1pr3     | 34.553057   | -0.7128973 | 0.1797903 | -4.616943 | 3.89E-06 | 6.00E-04 |
| Col11a2   | 239.035725  | -0.712395  | 0.1787753 | -3.982808 | 6.81E-05 | 6.75E-03 |
| Fxyd7     | 53.034754   | -0.7084429 | 0.2085922 | -3.399425 | 6.75E-04 | 3.79E-02 |
| Hoxa3     | 177.516428  | -0.7075926 | 0.1852637 | -3.814417 | 1.37E-04 | 1.10E-02 |
| Ccl6      | 124.607259  | -0.707321  | 0.2074918 | -3.466312 | 5.28E-04 | 3.10E-02 |
| Hid1      | 880.096927  | -0.7061947 | 0.18728   | -3.772385 | 1.62E-04 | 1.25E-02 |
| Ecscr     | 405.559422  | -0.7032363 | 0.1763328 | -3.987458 | 6.68E-05 | 6.71E-03 |
| Angptl3   | 51.897242   | -0.6909535 | 0.1873129 | -4.057749 | 4.95E-05 | 5.20E-03 |
| Itih4     | 70.212194   | -0.6901982 | 0.1788433 | -4.62263  | 3.79E-06 | 5.90E-04 |
| Zfp354c   | 257.498857  | -0.6899704 | 0.1822516 | -3.782947 | 1.55E-04 | 1.23E-02 |
| Sepp1     | 4396.032413 | -0.6867481 | 0.1554893 | -4.417085 | 1.00E-05 | 1.32E-03 |
| Gsta4     | 165.158002  | -0.6860896 | 0.1852658 | -3.698846 | 2.17E-04 | 1.57E-02 |
| Pde2a     | 1032.802806 | -0.6777887 | 0.1552155 | -4.365773 | 1.27E-05 | 1.58E-03 |
| Sox18     | 330.878521  | -0.675221  | 0.1869066 | -3.611193 | 3.05E-04 | 2.04E-02 |
| Ikbke     | 588.79895   | -0.6737371 | 0.1751544 | -3.846612 | 1.20E-04 | 1.04E-02 |
| Acox2     | 27.787547   | -0.6727887 | 0.1928802 | -3.660984 | 2.51E-04 | 1.76E-02 |
| Spon2     | 24.14373    | -0.6720432 | 0.1790074 | -4.255121 | 2.09E-05 | 2.44E-03 |
| Folr2     | 66.101804   | -0.6699711 | 0.1848569 | -4.064355 | 4.82E-05 | 5.09E-03 |
| Mafb      | 71.108701   | -0.6646306 | 0.1915939 | -3.716339 | 2.02E-04 | 1.49E-02 |
| Hpgd      | 243.375507  | -0.6636823 | 0.2033778 | -3.358521 | 7.84E-04 | 4.26E-02 |
| Trib2     | 30.32784    | -0.6589709 | 0.1962204 | -3.475335 | 5.10E-04 | 3.03E-02 |
| Tox       | 182.79478   | -0.6547175 | 0.1978662 | -3.308374 | 9.38E-04 | 4.83E-02 |
| Enpp2     | 19.831381   | -0.6539077 | 0.1673476 | -4.459628 | 8.21E-06 | 1.12E-03 |
| Serpina1c | 30.753348   | -0.6534966 | 0.1694613 | -4.821449 | 1.43E-06 | 2.49E-04 |
| F2        | 137.985609  | -0.6519707 | 0.1899692 | -3.717411 | 2.01E-04 | 1.49E-02 |
| Hmgcs2    | 66.286961   | -0.6517076 | 0.1866867 | -3.821031 | 1.33E-04 | 1.10E-02 |
| Irf6      | 419.737162  | -0.6478002 | 0.1799602 | -3.598377 | 3.20E-04 | 2.11E-02 |
| Btdb3     | 756.60238   | -0.6476678 | 0.1736222 | -3.730424 | 1.91E-04 | 1.43E-02 |
| Rdh12     | 335.366089  | -0.6476189 | 0.1687313 | -3.836034 | 1.25E-04 | 1.05E-02 |
| Sgsm1     | 599.945445  | -0.646276  | 0.1851816 | -3.49018  | 4.83E-04 | 2.94E-02 |
| Clec7a    | 43.489634   | -0.6440714 | 0.1854043 | -3.819564 | 1.34E-04 | 1.10E-02 |
| Pid1      | 19.555739   | -0.6414378 | 0.1669674 | -4.462714 | 8.09E-06 | 1.12E-03 |
| Snhg11    | 18.557363   | -0.6402921 | 0.1796922 | -3.889808 | 1.00E-04 | 9.07E-03 |
| Ccr5      | 48.258203   | -0.6379448 | 0.191622  | -3.535126 | 4.08E-04 | 2.59E-02 |
| Cd22      | 16.154108   | -0.6312287 | 0.1719102 | -4.12767  | 3.66E-05 | 4.08E-03 |
| Vdr       | 355.640531  | -0.6228348 | 0.1766514 | -3.524409 | 4.24E-04 | 2.66E-02 |
| Serpina1e | 38.051433   | -0.6218423 | 0.1719765 | -4.363863 | 1.28E-05 | 1.58E-03 |
| Stab2     | 95.478434   | -0.6149588 | 0.1821083 | -3.779788 | 1.57E-04 | 1.23E-02 |
| Prdm5     | 236.726949  | -0.6025731 | 0.1716197 | -3.507992 | 4.52E-04 | 2.79E-02 |
| Itgb5     | 55.029079   | -0.602156  | 0.1905149 | -3.359244 | 7.82E-04 | 4.26E-02 |
| Pld2      | 212.289872  | -0.6013125 | 0.1778686 | -3.377957 | 7.30E-04 | 4.03E-02 |
| Prodh2    | 25.066926   | -0.5940125 | 0.1835575 | -3.487032 | 4.88E-04 | 2.95E-02 |
| Cacna2d1  | 28.897228   | -0.5851662 | 0.1839661 | -3.400841 | 6.72E-04 | 3.78E-02 |
| Pparg     | 12.513595   | -0.584916  | 0.1613196 | -4.159281 | 3.19E-05 | 3.61E-03 |
| Zfp870    | 261.261655  | -0.5832662 | 0.1690622 | -3.448174 | 5.64E-04 | 3.27E-02 |
| Sema6d    | 70.021048   | -0.5759463 | 0.1819205 | -3.489483 | 4.84E-04 | 2.94E-02 |
| Ccr2      | 31.482134   | -0.5749633 | 0.1641945 | -4.394651 | 1.11E-05 | 1.42E-03 |
| Cd82      | 1163.312019 | -0.5728482 | 0.1479962 | -3.869963 | 1.09E-04 | 9.55E-03 |
| Sdc1      | 625.090596  | -0.5686102 | 0.1428271 | -3.979631 | 6.90E-05 | 6.75E-03 |
| Pld3      | 1009.029419 | -0.568319  | 0.1303116 | -4.360325 | 1.30E-05 | 1.59E-03 |
| Itm2a     | 948.230117  | -0.557254  | 0.1457528 | -3.822664 | 1.32E-04 | 1.10E-02 |
| Emcn      | 431.602261  | -0.5399243 | 0.163472  | -3.30217  | 9.59E-04 | 4.92E-02 |
| Cfi       | 73.177378   | -0.5364755 | 0.1737537 | -3.524603 | 4.24E-04 | 2.66E-02 |
| Tmem154   | 462.333986  | -0.5295636 | 0.1567916 | -3.376429 | 7.34E-04 | 4.04E-02 |
| Dsp       | 12.416632   | -0.5261037 | 0.1664281 | -3.487072 | 4.88E-04 | 2.95E-02 |
| Serinc5   | 905.106993  | -0.5241273 | 0.1402261 | -3.737005 | 1.86E-04 | 1.40E-02 |
| Tsc22d1   | 1756.658565 | -0.5239202 | 0.128265  | -4.084252 | 4.42E-05 | 4.78E-03 |
| Paqr9     | 19.762757   | -0.5238419 | 0.1722254 | -3.365295 | 7.65E-04 | 4.19E-02 |
| Cyp2c44   | 13.133108   | -0.5053779 | 0.1528904 | -4.065872 | 4.79E-05 | 5.09E-03 |
| Slc1a2    | 10.738583   | -0.5002941 | 0.1525938 | -3.886403 | 1.02E-04 | 9.15E-03 |
| Otc       | 34.423774   | -0.4956555 | 0.1652013 | -3.524145 | 4.25E-04 | 2.66E-02 |
| Cnn3      | 1250.912753 | -0.4943356 | 0.1444976 | -3.420833 | 6.24E-04 | 3.57E-02 |
| Atg14     | 552.507554  | -0.4829064 | 0.13574   | -3.556533 | 3.76E-04 | 2.40E-02 |
| Chga      | 22.222837   | -0.4801615 | 0.1611564 | -3.499253 | 4.67E-04 | 2.86E-02 |
| Hoxa9     | 1422.726811 | -0.4741318 | 0.1388621 | -3.414089 | 6.40E-04 | 3.63E-02 |
| Spp2      | 60.405342   | -0.4711199 | 0.1644517 | -3.35148  | 8.04E-04 | 4.32E-02 |
| Pcsk5     | 10.148476   | -0.4652567 | 0.1547821 | -3.420067 | 6.26E-04 | 3.57E-02 |
| Ugt2b34   | 35.343813   | -0.4594334 | 0.1615809 | -3.353415 | 7.98E-04 | 4.31E-02 |
| Mat1a     | 35.064494   | -0.4594317 | 0.1502972 | -4.172481 | 3.01E-05 | 3.46E-03 |
| Serpina1d | 49.183127   | -0.45479   | 0.1616428 | -3.324749 | 8.85E-04 | 4.64E-02 |

|             |             |            |           |           |          |          |
|-------------|-------------|------------|-----------|-----------|----------|----------|
| F13b        | 10.685743   | -0.4425091 | 0.1492807 | -3.481149 | 4.99E-04 | 3.00E-02 |
| Hmga2       | 1778.826852 | -0.4272461 | 0.1190899 | -3.587401 | 3.34E-04 | 2.18E-02 |
| Crp         | 22.172264   | -0.4202027 | 0.1473542 | -3.707476 | 2.09E-04 | 1.52E-02 |
| Pipox       | 17.931882   | -0.4137955 | 0.1470158 | -3.578772 | 3.45E-04 | 2.24E-02 |
| Glul        | 1361.034326 | -0.3975756 | 0.1205139 | -3.298679 | 9.71E-04 | 4.95E-02 |
| Abhd4       | 1432.976703 | -0.3939315 | 0.1118116 | -3.522871 | 4.27E-04 | 2.66E-02 |
| Itm2b       | 9587.609004 | -0.3855565 | 0.1116817 | -3.452241 | 5.56E-04 | 3.23E-02 |
| Adra2b      | 13.911228   | -0.3563666 | 0.1335481 | -3.774865 | 1.60E-04 | 1.25E-02 |
| Vsig4       | 8.387361    | -0.3463763 | 0.1305705 | -3.915673 | 9.02E-05 | 8.42E-03 |
| D10Bwg1379e | 7.762445    | -0.3404254 | 0.1297482 | -3.840029 | 1.23E-04 | 1.05E-02 |
| Ugt2b36     | 10.539274   | -0.2922276 | 0.1214889 | -3.895086 | 9.82E-05 | 8.99E-03 |
| BC024386    | 8.984557    | -0.255519  | 0.1149079 | -3.624912 | 2.89E-04 | 1.95E-02 |
| Vcam1       | 729.652925  | -0.2278482 | 0.1127439 | -3.353215 | 7.99E-04 | 4.31E-02 |

**Table S7:** Genes significantly upregulated in *Setdb1*<sup>Δ</sup> MPPs (top 200)

| gene          | baseMean | log2FoldChange | lfcSE      | stat      | pvalue    | padj      |
|---------------|----------|----------------|------------|-----------|-----------|-----------|
| Fbp2          | 1.58E+03 | 8.2541579      | 0.24438549 | 20.60665  | 2.39E-94  | 3.44E-91  |
| Tex19.1       | 1.08E+03 | 8.083226       | 0.28192239 | 11.457578 | 2.15E-30  | 3.60E-28  |
| Tmem150c      | 4.67E+02 | 7.1041668      | 0.2860165  | 9.649715  | 4.93E-22  | 4.40E-20  |
| Car1          | 9.42E+03 | 6.982836       | 0.15262235 | 45.185125 | 0.00E+00  | 0.00E+00  |
| Meioc         | 2.08E+02 | 5.2794679      | 0.32981941 | 9.781682  | 1.35E-22  | 1.27E-20  |
| Ak7           | 1.62E+02 | 5.2075651      | 0.31248955 | 11.046507 | 2.28E-28  | 3.45E-26  |
| Amotl1        | 1.54E+02 | 5.1732828      | 0.29920875 | 12.118374 | 8.44E-34  | 1.78E-31  |
| Magea13       | 2.09E+02 | 4.8787257      | 0.2666422  | 15.846501 | 1.49E-56  | 7.91E-54  |
| Gstp2         | 2.48E+02 | 4.5292684      | 0.25200899 | 16.681776 | 1.78E-62  | 1.16E-59  |
| Fbp1          | 4.29E+02 | 4.4745765      | 0.18136385 | 23.763939 | 7.89E-125 | 1.89E-121 |
| Vmn2r96       | 6.50E+01 | 4.4481598      | 0.34529664 | 7.839606  | 4.52E-15  | 2.00E-13  |
| Arl14epl      | 6.43E+01 | 4.2773757      | 0.3400137  | 7.19541   | 6.23E-13  | 2.08E-11  |
| Ryr2          | 1.40E+02 | 4.1225307      | 0.26760501 | 14.011934 | 1.32E-44  | 5.12E-42  |
| Olfrl1372-ps1 | 4.36E+01 | 3.9968248      | 0.35344406 | 7.328812  | 2.32E-13  | 8.36E-12  |
| Sec14l4       | 4.66E+01 | 3.9206038      | 0.34595845 | 6.73355   | 1.66E-11  | 4.45E-10  |
| Ntnq1         | 9.60E+01 | 3.8200288      | 0.27801616 | 12.368047 | 3.89E-35  | 9.32E-33  |
| Tcf15         | 3.38E+01 | 3.5923296      | 0.36272554 | 6.935883  | 4.04E-12  | 1.20E-10  |
| Akap5         | 2.94E+02 | 3.4304792      | 0.18153778 | 18.56288  | 6.42E-77  | 5.76E-74  |
| Pla2g5        | 3.04E+01 | 3.3887289      | 0.36248962 | 6.024304  | 1.70E-09  | 3.32E-08  |
| Stag3         | 1.61E+03 | 3.344433       | 0.13921801 | 23.967611 | 6.06E-127 | 1.74E-123 |
| Sdsl          | 6.30E+01 | 3.3285062      | 0.30508122 | 9.916427  | 3.53E-23  | 3.45E-21  |
| Grhl2         | 2.90E+01 | 3.2989723      | 0.35949484 | 5.979455  | 2.24E-09  | 4.27E-08  |
| lqcg          | 2.30E+02 | 3.2480146      | 0.18828823 | 16.923842 | 3.00E-64  | 2.16E-61  |
| Aplp1         | 4.41E+01 | 3.2396361      | 0.32816101 | 8.573795  | 1.00E-17  | 5.80E-16  |
| M1ap          | 5.83E+02 | 3.1619179      | 0.14407853 | 21.811953 | 1.79E-105 | 2.85E-102 |
| Cyp2b10       | 2.82E+01 | 3.1547991      | 0.37208061 | 6.559276  | 5.41E-11  | 1.35E-09  |
| Mmp14         | 1.05E+02 | 3.1159403      | 0.26237901 | 11.434653 | 2.81E-30  | 4.63E-28  |
| Slc4a8        | 1.19E+02 | 3.1105676      | 0.23038539 | 13.050133 | 6.34E-39  | 2.03E-36  |
| Ltbp1         | 2.45E+02 | 3.0817303      | 0.20722643 | 14.668696 | 1.02E-48  | 4.59E-46  |
| Homer2        | 2.16E+02 | 3.0658014      | 0.34542929 | 8.881049  | 6.62E-19  | 4.47E-17  |
| Dnah8         | 1.42E+03 | 3.0363132      | 0.11592375 | 26.140477 | 1.26E-150 | 9.08E-147 |
| Cdsn          | 2.05E+01 | 3.0092211      | 0.37226303 | 6.253657  | 4.01E-10  | 8.83E-09  |
| Ly6k          | 4.23E+01 | 3.001536       | 0.36433733 | 7.177866  | 7.08E-13  | 2.35E-11  |
| Padi3         | 2.56E+02 | 2.977548       | 0.18555072 | 15.855746 | 1.28E-56  | 7.09E-54  |
| Kirrel2       | 2.44E+01 | 2.9753266      | 0.36264435 | 6.110809  | 9.91E-10  | 2.05E-08  |
| Cyp2a12       | 1.95E+01 | 2.9560387      | 0.37297182 | 6.187053  | 6.13E-10  | 1.30E-08  |
| Myrip         | 2.56E+01 | 2.9076802      | 0.36671585 | 6.065094  | 1.32E-09  | 2.65E-08  |
| Ackr1         | 8.61E+01 | 2.8773135      | 0.26332001 | 10.547203 | 5.23E-26  | 6.26E-24  |
| Gabbr1        | 2.07E+01 | 2.870101       | 0.37208456 | 5.469914  | 4.50E-08  | 6.80E-07  |
| Vwa5b2        | 4.08E+01 | 2.8574232      | 0.32468856 | 8.072025  | 6.91E-16  | 3.31E-14  |
| Col5a1        | 9.25E+02 | 2.8514505      | 0.17159252 | 16.5788   | 9.92E-62  | 6.20E-59  |
| Lama1         | 1.82E+01 | 2.8369186      | 0.37479207 | 6.063762  | 1.33E-09  | 2.66E-08  |
| Nfatc4        | 1.82E+01 | 2.8278286      | 0.37495495 | 6.057338  | 1.38E-09  | 2.76E-08  |
| Cntn3         | 4.21E+01 | 2.7769376      | 0.32963023 | 7.834128  | 4.72E-15  | 2.08E-13  |
| Entpd3        | 3.28E+01 | 2.7663237      | 0.3598698  | 6.860813  | 6.85E-12  | 1.96E-10  |
| Tmem132d      | 2.68E+01 | 2.7449186      | 0.35642945 | 6.67772   | 2.43E-11  | 6.42E-10  |
| Nccrp1        | 2.86E+01 | 2.743152       | 0.35427774 | 6.818235  | 9.22E-12  | 2.58E-10  |
| Ly6c1         | 1.77E+01 | 2.6979353      | 0.37420186 | 5.259703  | 1.44E-07  | 1.99E-06  |
| Prr19         | 3.79E+01 | 2.6942456      | 0.34999997 | 7.141996  | 9.20E-13  | 3.01E-11  |
| Dppa4         | 1.76E+01 | 2.6789908      | 0.37707019 | 5.937862  | 2.89E-09  | 5.37E-08  |
| Ahsa2         | 1.66E+03 | 2.632368       | 0.11423269 | 23.020153 | 2.93E-117 | 6.01E-114 |



|               |          |           |            |           |           |           |
|---------------|----------|-----------|------------|-----------|-----------|-----------|
| Il1r1         | 2.96E+02 | 2.6204741 | 0.21618071 | 12.04907  | 1.96E-33  | 4.03E-31  |
| Pcsk9         | 1.04E+02 | 2.6153912 | 0.23716617 | 10.801604 | 3.38E-27  | 4.65E-25  |
| 2410076I21Rik | 7.70E+01 | 2.6104434 | 0.30745884 | 8.279124  | 1.24E-16  | 6.37E-15  |
| 1700029P11Rik | 1.49E+01 | 2.5787021 | 0.37757459 | 5.762687  | 8.28E-09  | 1.42E-07  |
| Vmn2r24       | 1.52E+01 | 2.5766322 | 0.37765178 | 5.770258  | 7.92E-09  | 1.36E-07  |
| 1700097N02Rik | 4.29E+02 | 2.5743662 | 0.3351893  | 7.722739  | 1.14E-14  | 4.85E-13  |
| Col4a3        | 3.93E+01 | 2.571029  | 0.33847733 | 7.176444  | 7.15E-13  | 2.37E-11  |
| 2810474O19Rik | 3.30E+03 | 2.5670461 | 0.10242141 | 25.051977 | 1.66E-138 | 7.96E-135 |
| Ankrd36       | 2.08E+01 | 2.5257113 | 0.36766677 | 5.88643   | 3.95E-09  | 7.14E-08  |
| Adad2         | 1.77E+01 | 2.4764895 | 0.37319994 | 5.361957  | 8.23E-08  | 1.19E-06  |
| Sptb          | 1.35E+03 | 2.4566872 | 0.15061662 | 16.29497  | 1.07E-59  | 6.41E-57  |
| Xlr3a         | 2.31E+01 | 2.4307363 | 0.36640856 | 5.980374  | 2.23E-09  | 6.45E-08  |
| BC051019      | 1.65E+01 | 2.4271703 | 0.37331679 | 5.262914  | 1.42E-07  | 1.96E-06  |
| Epcam         | 5.27E+01 | 2.4271036 | 0.29943945 | 7.84435   | 4.35E-15  | 1.94E-13  |
| Ndufa4l2      | 5.94E+02 | 2.4244287 | 0.31992395 | 7.598859  | 2.99E-14  | 1.23E-12  |
| Ano1          | 4.60E+01 | 2.4012748 | 0.3078289  | 7.515032  | 5.69E-14  | 2.23E-12  |
| Tex19.2       | 1.44E+01 | 2.3893618 | 0.37787824 | 4.929744  | 8.23E-07  | 9.79E-06  |
| Amigo2        | 9.92E+01 | 2.3524958 | 0.24923359 | 9.301851  | 1.38E-20  | 1.06E-18  |
| Pxt1          | 3.66E+01 | 2.332726  | 0.32156663 | 6.942113  | 3.86E-12  | 1.15E-10  |
| Gtsf1         | 1.59E+01 | 2.3087368 | 0.37580444 | 5.102801  | 3.35E-07  | 4.29E-06  |
| Upk1b         | 2.45E+01 | 2.2966229 | 0.35447098 | 6.04418   | 1.50E-09  | 2.97E-08  |
| Tdrd5         | 2.36E+01 | 2.2917469 | 0.3618248  | 5.892723  | 3.80E-09  | 6.90E-08  |
| Dmc1          | 7.41E+01 | 2.2666426 | 0.27267926 | 8.166755  | 3.17E-16  | 1.57E-14  |
| Mt2           | 2.10E+03 | 2.2587531 | 0.15696362 | 14.383432 | 6.58E-47  | 2.78E-44  |
| Gypa          | 7.37E+02 | 2.2565957 | 0.18243251 | 12.352005 | 4.75E-35  | 1.10E-32  |
| Wbp2nl        | 1.18E+01 | 2.244762  | 0.37899335 | 5.367012  | 8.01E-08  | 1.16E-06  |
| Serpnb9g      | 1.16E+01 | 2.2413306 | 0.37899351 | 5.356585  | 8.48E-08  | 1.22E-06  |
| Penk          | 3.03E+01 | 2.2370209 | 0.36826337 | 5.845052  | 5.06E-09  | 9.01E-08  |
| Popdc2        | 6.65E+01 | 2.2248377 | 0.28895163 | 7.559147  | 4.06E-14  | 1.61E-12  |
| Sgcz          | 1.13E+01 | 2.1990749 | 0.37894313 | 5.302462  | 1.14E-07  | 1.60E-06  |
| Cbr3          | 2.10E+01 | 2.1823257 | 0.35769163 | 5.689323  | 1.28E-08  | 2.10E-07  |
| 4930433N12Rik | 1.56E+01 | 2.1705249 | 0.37882052 | 4.704372  | 2.55E-06  | 2.71E-05  |
| Tspo2         | 6.90E+02 | 2.1641035 | 0.16758155 | 12.895819 | 4.75E-38  | 1.42E-35  |
| Pcdhga12      | 5.06E+01 | 2.1629848 | 0.28982032 | 7.287607  | 3.16E-13  | 1.11E-11  |
| Ank2          | 4.30E+01 | 2.1504115 | 0.32294262 | 6.487961  | 8.70E-11  | 2.09E-09  |
| Gal3st3       | 2.65E+01 | 2.1444144 | 0.35130444 | 5.829809  | 5.55E-09  | 9.83E-08  |
| Amn           | 1.61E+01 | 2.1425722 | 0.3769106  | 5.048975  | 4.44E-07  | 5.55E-06  |
| Boll          | 2.96E+01 | 2.1321832 | 0.34097267 | 6.011172  | 1.84E-09  | 3.59E-08  |
| Tmod1         | 1.43E+02 | 2.1304337 | 0.24505362 | 8.634574  | 5.89E-18  | 3.47E-16  |
| Cbr2          | 1.89E+01 | 2.1233983 | 0.36996244 | 5.333892  | 9.61E-08  | 1.38E-06  |
| Apol8         | 7.51E+01 | 2.115492  | 0.29226115 | 7.144207  | 9.05E-13  | 2.97E-11  |
| Epb4.2        | 5.99E+02 | 2.1015449 | 0.16074989 | 13.05361  | 6.06E-39  | 1.98E-36  |
| Grtp1         | 5.78E+01 | 2.0952139 | 0.28483933 | 7.221951  | 5.12E-13  | 1.73E-11  |
| D330045A20Rik | 1.40E+02 | 2.0940183 | 0.23196378 | 8.963982  | 3.13E-19  | 2.19E-17  |
| Sowaha        | 8.93E+01 | 2.0936704 | 0.25665094 | 8.066341  | 7.24E-16  | 3.45E-14  |
| Horrad2       | 8.87E+01 | 2.0871257 | 0.27599417 | 7.483542  | 7.23E-14  | 2.79E-12  |
| 5730507C01Rik | 3.88E+01 | 2.072165  | 0.3071122  | 6.561114  | 5.34E-11  | 1.34E-09  |
| Cebpe         | 1.23E+02 | 2.0714911 | 0.24886287 | 8.261228  | 1.44E-16  | 7.34E-15  |
| Dzip1         | 1.46E+02 | 2.0662841 | 0.20935162 | 9.803614  | 1.09E-22  | 1.03E-20  |
| 4930447C04Rik | 2.72E+02 | 2.063864  | 0.19053148 | 10.796215 | 3.59E-27  | 4.86E-25  |
| Smarca5-ps    | 3.68E+01 | 2.0600335 | 0.32338929 | 6.198111  | 5.71E-10  | 1.22E-08  |
| Vangl1        | 3.21E+02 | 2.0567091 | 0.17820156 | 11.50894  | 1.19E-30  | 2.03E-28  |
| Slc7a15       | 1.07E+01 | 2.0521509 | 0.37897587 | 4.50194   | 6.73E-06  | 6.50E-05  |
| Redrum        | 4.80E+02 | 2.0423822 | 0.16072623 | 12.684269 | 7.23E-37  | 1.96E-34  |
| Snca          | 3.96E+02 | 2.0400194 | 0.19436385 | 10.473953 | 1.14E-25  | 1.34E-23  |
| Slc30a10      | 2.92E+02 | 2.0361654 | 0.19624331 | 10.34534  | 4.39E-25  | 4.85E-23  |
| D10Bwg1379e   | 3.22E+01 | 2.0150673 | 0.33196491 | 5.893414  | 3.78E-09  | 6.88E-08  |
| Mt1           | 4.41E+03 | 2.0136056 | 0.14051912 | 14.327448 | 1.47E-46  | 6.05E-44  |
| Gm10532       | 1.26E+01 | 2.0102036 | 0.3789976  | 4.425531  | 9.62E-06  | 8.99E-05  |
| Plcd3         | 6.98E+01 | 2.0062575 | 0.27996756 | 7.077194  | 1.47E-12  | 4.62E-11  |
| 1700112E06Rik | 3.52E+01 | 1.9883581 | 0.32162862 | 6.020759  | 1.74E-09  | 3.39E-08  |
| Stk32b        | 2.96E+01 | 1.9739019 | 0.33112361 | 5.775883  | 7.66E-09  | 1.32E-07  |
| Optn          | 2.50E+02 | 1.9674104 | 0.19523599 | 10.045178 | 9.65E-24  | 9.69E-22  |
| Slc1a4        | 4.12E+02 | 1.9630441 | 0.17766528 | 11.028837 | 2.77E-28  | 4.15E-26  |
| Gstp1         | 2.60E+03 | 1.9605183 | 0.1120568  | 17.490958 | 1.68E-68  | 1.27E-65  |
| Tuba8         | 1.36E+02 | 1.9585726 | 0.20858646 | 9.330734  | 1.05E-20  | 8.12E-19  |
| Acacb         | 6.63E+01 | 1.9553998 | 0.25574239 | 7.542733  | 4.60E-14  | 1.82E-12  |
| Trap1a        | 1.16E+03 | 1.9540155 | 0.37261897 | 8.957164  | 3.33E-19  | 2.32E-17  |
| Nfx1          | 5.64E+02 | 1.9495015 | 0.14093272 | 13.813961 | 2.10E-43  | 7.94E-41  |
| Klf5          | 8.05E+01 | 1.9464011 | 0.25624007 | 7.517698  | 5.57E-14  | 2.19E-12  |

|               |          |           |            |           |          |          |
|---------------|----------|-----------|------------|-----------|----------|----------|
| Fech          | 2.69E+03 | 1.9415137 | 0.14453862 | 13.429242 | 4.08E-41 | 1.46E-38 |
| Tdrd9         | 1.22E+01 | 1.9391623 | 0.37769286 | 4.591633  | 4.40E-06 | 4.44E-05 |
| Gsdma3        | 1.07E+01 | 1.9379318 | 0.37671399 | 5.058685  | 4.22E-07 | 5.30E-06 |
| Atp6ap1l      | 9.95E+00 | 1.9309149 | 0.37855964 | 4.36595   | 1.27E-05 | 1.15E-04 |
| Fcgr2b        | 2.62E+02 | 1.9230629 | 0.17738093 | 10.809547 | 3.10E-27 | 4.33E-25 |
| Acox1         | 9.61E+00 | 1.9169993 | 0.37853477 | 4.332432  | 1.47E-05 | 1.32E-04 |
| Prss42        | 1.33E+01 | 1.9152947 | 0.37721834 | 4.65955   | 3.17E-06 | 3.30E-05 |
| 2310043L19Rik | 9.08E+00 | 1.9062002 | 0.37678334 | 4.927773  | 8.32E-07 | 9.84E-06 |
| Podxl         | 5.64E+02 | 1.9029792 | 0.15912148 | 11.944381 | 6.95E-33 | 1.41E-30 |
| Hvcn1         | 1.21E+02 | 1.8994078 | 0.21318079 | 8.85126   | 8.65E-19 | 5.73E-17 |
| 2210417A02Rik | 1.50E+01 | 1.8992132 | 0.37186007 | 4.788962  | 1.68E-06 | 1.87E-05 |
| Add2          | 1.75E+03 | 1.899148  | 0.16138124 | 11.76389  | 5.99E-32 | 1.09E-29 |
| Vwce          | 2.57E+01 | 1.8902033 | 0.3477712  | 5.271153  | 1.36E-07 | 1.89E-06 |
| Il1bos        | 1.20E+01 | 1.889921  | 0.37821979 | 4.510582  | 6.47E-06 | 6.28E-05 |
| Eif5a2        | 1.97E+02 | 1.8824409 | 0.18218032 | 10.292988 | 7.58E-25 | 8.25E-23 |
| 1700030C10Rik | 8.08E+01 | 1.8733156 | 0.27241749 | 6.817067  | 9.29E-12 | 2.59E-10 |
| Abcg4         | 2.72E+02 | 1.8675217 | 0.17312577 | 10.758813 | 5.39E-27 | 7.23E-25 |
| Cpne7         | 3.47E+01 | 1.8635477 | 0.32763337 | 5.569335  | 2.56E-08 | 4.05E-07 |
| Ank1          | 8.26E+02 | 1.8525289 | 0.14680183 | 12.609505 | 1.87E-36 | 4.89E-34 |
| Rragd         | 1.45E+01 | 1.8515074 | 0.37279034 | 4.676028  | 2.92E-06 | 3.07E-05 |
| Rnf17         | 3.87E+02 | 1.8453956 | 0.36339271 | 5.151091  | 2.59E-07 | 3.41E-06 |
| Cnm1          | 2.77E+01 | 1.8435696 | 0.34391923 | 5.228558  | 1.71E-07 | 2.32E-06 |
| Trim10        | 3.19E+02 | 1.8393796 | 0.19583773 | 9.374018  | 6.98E-21 | 5.48E-19 |
| Ank3          | 2.63E+01 | 1.8343701 | 0.34533591 | 5.17026   | 2.34E-07 | 3.10E-06 |
| Rgcc          | 9.13E+02 | 1.8282528 | 0.15335036 | 11.914362 | 9.96E-33 | 1.96E-30 |
| Itgb2l        | 4.42E+01 | 1.8263005 | 0.31995682 | 5.624701  | 1.86E-08 | 3.00E-07 |
| Ccln2         | 4.71E+02 | 1.8090039 | 0.1744751  | 10.355095 | 3.97E-25 | 4.42E-23 |
| 1300017J02Rik | 9.66E+01 | 1.8084013 | 0.22951985 | 7.821863  | 5.20E-15 | 2.29E-13 |
| St6galnac5    | 3.73E+01 | 1.7994762 | 0.32405846 | 5.457667  | 4.82E-08 | 7.23E-07 |
| Slc6a9        | 2.34E+02 | 1.7981928 | 0.19361983 | 9.262268  | 2.00E-20 | 1.51E-18 |
| Rhox5         | 2.29E+01 | 1.7972429 | 0.37487027 | 4.719689  | 2.36E-06 | 2.53E-05 |
| Prkd1         | 2.59E+01 | 1.7891198 | 0.34175806 | 5.101486  | 3.37E-07 | 4.31E-06 |
| Trim24        | 6.65E+02 | 1.7841554 | 0.14478288 | 12.312184 | 7.79E-35 | 1.75E-32 |
| Sh3d19        | 1.42E+02 | 1.780313  | 0.21482112 | 8.250458  | 1.58E-16 | 7.98E-15 |
| Tex15         | 1.22E+02 | 1.7748523 | 0.37478047 | 5.705069  | 1.16E-08 | 1.92E-07 |
| Fam83g        | 1.09E+02 | 1.7733599 | 0.22563604 | 7.812588  | 5.60E-15 | 2.44E-13 |
| Rhag          | 2.55E+03 | 1.7696599 | 0.28906694 | 6.126993  | 8.96E-10 | 1.87E-08 |
| Irs2          | 1.90E+02 | 1.7587364 | 0.2019191  | 8.682935  | 3.86E-18 | 2.28E-16 |
| Trem3         | 7.91E+01 | 1.7576669 | 0.27024601 | 6.454857  | 1.08E-10 | 2.59E-09 |
| Adam8         | 1.32E+02 | 1.7559211 | 0.21489626 | 8.132031  | 4.22E-16 | 2.07E-14 |
| Arhgef12      | 9.93E+01 | 1.7542993 | 0.24328562 | 7.166975  | 7.67E-13 | 2.53E-11 |
| Slc41a3       | 7.54E+02 | 1.7519053 | 0.16899152 | 10.359446 | 3.79E-25 | 4.26E-23 |
| Sdk1          | 2.14E+01 | 1.7485105 | 0.35713452 | 4.762848  | 1.91E-06 | 2.10E-05 |
| Slc16a3       | 1.37E+03 | 1.7450623 | 0.14662717 | 11.896841 | 1.23E-32 | 2.38E-30 |
| Arsg          | 1.01E+02 | 1.7428601 | 0.25010653 | 6.928161  | 4.26E-12 | 1.26E-10 |
| Bmp7          | 1.98E+01 | 1.7318167 | 0.36600178 | 4.607125  | 4.08E-06 | 4.14E-05 |
| Msrb3         | 8.45E+02 | 1.7301374 | 0.15843142 | 10.913954 | 9.89E-28 | 1.43E-25 |
| 1700001L05Rik | 2.07E+02 | 1.7282591 | 0.19253148 | 8.951137  | 3.52E-19 | 2.44E-17 |
| Spats2        | 2.06E+02 | 1.7270595 | 0.18042072 | 9.544908  | 1.36E-21 | 1.15E-19 |
| Ccl2          | 4.43E+01 | 1.726626  | 0.32467141 | 5.25478   | 1.48E-07 | 2.04E-06 |
| Pak6          | 2.60E+01 | 1.7219666 | 0.3467813  | 4.857082  | 1.19E-06 | 1.37E-05 |
| Tspan33       | 4.62E+02 | 1.7174177 | 0.19021571 | 9.019235  | 1.89E-19 | 1.35E-17 |
| Aldh1l2       | 1.15E+01 | 1.7161724 | 0.3774673  | 4.264996  | 2.00E-05 | 1.73E-04 |
| Akap2         | 5.96E+01 | 1.7146673 | 0.2958471  | 5.74384   | 9.26E-09 | 1.57E-07 |
| Hesx1         | 1.68E+02 | 1.7135531 | 0.21570412 | 7.917612  | 2.42E-15 | 1.10E-13 |
| Cpox          | 4.03E+03 | 1.7084151 | 0.1432706  | 11.92307  | 8.97E-33 | 1.79E-30 |
| Ccdc36        | 1.08E+02 | 1.7040506 | 0.24567178 | 6.901606  | 5.14E-12 | 1.50E-10 |
| Asns          | 4.17E+03 | 1.7006954 | 0.14832721 | 11.464606 | 1.99E-30 | 3.36E-28 |
| Endod1        | 6.06E+02 | 1.6951126 | 0.16004222 | 10.582936 | 3.58E-26 | 4.43E-24 |
| Topaz1        | 8.57E+00 | 1.6852439 | 0.37203864 | 4.695433  | 2.66E-06 | 2.82E-05 |
| Nipa1         | 1.01E+02 | 1.6814922 | 0.23888885 | 7.000687  | 2.55E-12 | 7.72E-11 |
| Garem         | 3.17E+02 | 1.6790166 | 0.17210148 | 9.740019  | 2.04E-22 | 1.87E-20 |
| Pnma5         | 7.29E+00 | 1.6762174 | 0.37261055 | 4.585052  | 4.54E-06 | 4.55E-05 |
| Gpat2         | 2.92E+01 | 1.664523  | 0.34356771 | 4.764981  | 1.89E-06 | 2.09E-05 |
| Syce1         | 2.48E+01 | 1.6634882 | 0.36858931 | 4.454438  | 8.41E-06 | 7.94E-05 |
| Plkr          | 1.42E+03 | 1.662053  | 0.16003003 | 10.3826   | 2.98E-25 | 3.39E-23 |
| Socs2         | 3.03E+02 | 1.6568173 | 0.19767477 | 8.368816  | 5.82E-17 | 3.11E-15 |
| Abcb10        | 1.48E+03 | 1.6509062 | 0.13643081 | 12.097008 | 1.10E-33 | 2.28E-31 |
| Fgl1          | 8.82E+00 | 1.6505894 | 0.37454591 | 4.07219   | 4.66E-05 | 3.63E-04 |
| Fbxl2         | 1.28E+02 | 1.6486457 | 0.22321685 | 7.355764  | 1.90E-13 | 6.97E-12 |

|              |          |           |            |           |          |          |
|--------------|----------|-----------|------------|-----------|----------|----------|
| Ache         | 7.13E+01 | 1.6460253 | 0.2758719  | 5.925142  | 3.12E-09 | 5.75E-08 |
| Fam210b      | 5.51E+02 | 1.6452739 | 0.17284593 | 9.51093   | 1.89E-21 | 1.57E-19 |
| LOC100503676 | 1.63E+01 | 1.6445516 | 0.36858571 | 4.327371  | 1.51E-05 | 1.34E-04 |
| Gal3st1      | 6.43E+01 | 1.6435764 | 0.27818269 | 5.862843  | 4.55E-09 | 8.14E-08 |
| Lmna         | 1.12E+03 | 1.642653  | 0.14726075 | 11.150278 | 7.14E-29 | 1.10E-26 |
| Gm364        | 8.46E+00 | 1.6325516 | 0.37718667 | 3.8102    | 1.39E-04 | 9.64E-04 |
| Spta1        | 5.14E+02 | 1.6276725 | 0.16588143 | 9.803417  | 1.09E-22 | 1.03E-20 |
| Pkhd11l      | 6.99E+01 | 1.6273659 | 0.26486748 | 6.099877  | 1.06E-09 | 2.18E-08 |
| Icam4        | 5.39E+02 | 1.6265693 | 0.16921394 | 9.604373  | 7.66E-22 | 6.75E-20 |

**Table S8:** Genes significantly downregulated in *Setdb1*<sup>va</sup> MPPs (top 200)

| gene          | baseMean   | log2FoldChange | lfcSE      | stat       | pvalue   | padj     |
|---------------|------------|----------------|------------|------------|----------|----------|
| Pcmt1         | 259.461109 | -0.4149673     | 0.15265721 | -2.71788   | 6.57E-03 | 2.57E-02 |
| Stau2         | 94.001797  | -0.8126577     | 0.23887946 | -3.39753   | 6.80E-04 | 3.82E-03 |
| Ly96          | 77.646431  | -0.681469      | 0.23406031 | -2.907893  | 3.64E-03 | 1.57E-02 |
| Jph1          | 5.812483   | -1.4105675     | 0.36537442 | -4.122636  | 3.75E-05 | 2.99E-04 |
| Bend6         | 4.76038    | -1.0029569     | 0.35992232 | -2.702846  | 6.87E-03 | 2.67E-02 |
| Arid5a        | 788.548212 | -0.7710534     | 0.14979253 | -5.146777  | 2.65E-07 | 3.48E-06 |
| Kansl3        | 1136.77299 | -0.3277806     | 0.12227354 | -2.680649  | 7.35E-03 | 2.82E-02 |
| Lman2l        | 642.047384 | -0.4913136     | 0.13580279 | -3.617597  | 2.97E-04 | 1.86E-03 |
| Cnm4          | 264.515439 | -0.5642653     | 0.15058264 | -3.7462    | 1.80E-04 | 1.21E-03 |
| Sema4c        | 141.092519 | -1.5714217     | 0.21445763 | -7.298457  | 2.91E-13 | 1.03E-11 |
| Inpp4a        | 156.856103 | -0.5159228     | 0.17885481 | -2.883514  | 3.93E-03 | 1.68E-02 |
| 2010300C02Rik | 11.502283  | -1.0684195     | 0.37743572 | -2.799482  | 5.12E-03 | 2.09E-02 |
| Il18rap       | 534.470406 | -0.4412928     | 0.13925104 | -3.168803  | 1.53E-03 | 7.60E-03 |
| Fhl2          | 3.188195   | -0.7616386     | 0.33188367 | -2.474872  | 1.33E-02 | 4.58E-02 |
| Slc40a1       | 1492.34733 | -0.8855074     | 0.13353628 | -6.630541  | 3.34E-11 | 8.59E-10 |
| Sdpr          | 34.754133  | -3.1150944     | 0.34716129 | -7.291983  | 3.05E-13 | 1.07E-11 |
| Nabp1         | 376.915639 | -0.6220399     | 0.13543957 | -4.591731  | 4.40E-06 | 4.44E-05 |
| Myo1b         | 50.560413  | -1.1412251     | 0.28029017 | -4.050389  | 5.11E-05 | 3.94E-04 |
| Stat4         | 1057.97101 | -0.382895      | 0.12398623 | -3.088119  | 2.01E-03 | 9.66E-03 |
| Stat1         | 1225.38643 | -0.9441332     | 0.15262202 | -6.185383  | 6.20E-10 | 1.31E-08 |
| Pgap1         | 36.169685  | -1.3545791     | 0.31984774 | -4.192934  | 2.75E-05 | 2.29E-04 |
| Ankrd44       | 561.870478 | -0.6479016     | 0.12884948 | -5.027611  | 4.97E-07 | 6.13E-06 |
| Clk1          | 2185.18145 | -0.6903021     | 0.11518644 | -5.992662  | 2.06E-09 | 3.98E-08 |
| Cflar         | 465.712518 | -0.3464866     | 0.13729051 | -2.523603  | 1.16E-02 | 4.11E-02 |
| Raph1         | 77.038384  | -1.1795257     | 0.23808161 | -4.934756  | 8.03E-07 | 9.55E-06 |
| Cd28          | 39.579292  | -1.8931908     | 0.30662667 | -6.024879  | 1.69E-09 | 3.32E-08 |
| Icos          | 79.789007  | -2.1144106     | 0.25710427 | -8.092248  | 5.86E-16 | 2.83E-14 |
| Pard3b        | 106.863035 | -0.8221206     | 0.20786255 | -3.949846  | 7.82E-05 | 5.73E-04 |
| Klf7          | 49.676084  | -0.8582828     | 0.27503384 | -3.111534  | 1.86E-03 | 9.02E-03 |
| Plekhm3       | 265.312809 | -0.5556024     | 0.14890062 | -3.730418  | 1.91E-04 | 1.27E-03 |
| ldh1          | 621.115756 | -0.567858      | 0.12036147 | -4.717403  | 2.39E-06 | 2.56E-05 |
| Ikzf2         | 465.995697 | -0.7642567     | 0.14010883 | -5.453365  | 4.94E-08 | 7.39E-07 |
| Fn1           | 161.838603 | -2.2215622     | 0.19054898 | -11.550504 | 7.34E-31 | 1.27E-28 |
| Igfbp5        | 9.031992   | -1.7044485     | 0.37660478 | -4.063464  | 4.83E-05 | 3.75E-04 |
| Tns1          | 988.781827 | -0.4702976     | 0.12704468 | -3.701645  | 2.14E-04 | 1.40E-03 |
| Cxcr2         | 84.999467  | -0.5756822     | 0.23076496 | -2.492567  | 1.27E-02 | 4.40E-02 |
| Aamp          | 3883.03981 | -0.2938244     | 0.09821668 | -2.991578  | 2.78E-03 | 1.26E-02 |
| Slc11a1       | 209.721792 | -1.8826082     | 0.20583033 | -9.109243  | 8.30E-20 | 6.14E-18 |
| Ctdsp1        | 321.762893 | -0.3836821     | 0.14219937 | -2.697916  | 6.98E-03 | 2.70E-02 |
| Cyp27a1       | 206.341002 | -0.8542764     | 0.18303303 | -4.663938  | 3.10E-06 | 3.24E-05 |
| Prkag3        | 9.391356   | -1.0946195     | 0.37899768 | -2.849877  | 4.37E-03 | 1.83E-02 |
| Glb1l         | 177.387095 | -0.5256631     | 0.17681203 | -2.971991  | 2.96E-03 | 1.33E-02 |
| Dnpep         | 734.760163 | -0.3748064     | 0.11825264 | -3.169398  | 1.53E-03 | 7.59E-03 |
| Spep          | 30.995259  | -0.7784761     | 0.31438098 | -2.467813  | 1.36E-02 | 4.65E-02 |
| Obsl1         | 165.050039 | -1.0410637     | 0.21223951 | -4.899023  | 9.63E-07 | 1.13E-05 |
| Stk11ip       | 964.532855 | -0.2807838     | 0.10770398 | -2.606947  | 9.14E-03 | 3.37E-02 |
| Dock10        | 2229.53262 | -0.6782504     | 0.12088418 | -5.610539  | 2.02E-08 | 3.24E-07 |
| Pid1          | 83.529174  | -3.0992277     | 0.28652566 | -10.228214 | 1.48E-24 | 1.59E-22 |
| Sp110         | 1395.68846 | -0.9055007     | 0.13498342 | -6.707538  | 1.98E-11 | 5.28E-10 |
| Sp140         | 244.052945 | -1.0219332     | 0.15475787 | -6.597299  | 4.19E-11 | 1.06E-09 |
| Sp100         | 630.925317 | -1.0147197     | 0.17764112 | -5.71057   | 1.13E-08 | 1.87E-07 |
| A630001G21Rik | 277.933277 | -0.7979153     | 0.16046569 | -4.970186  | 6.69E-07 | 8.09E-06 |
| Itn2c         | 559.284404 | -0.5405304     | 0.12863206 | -4.201683  | 2.65E-05 | 2.21E-04 |
| Inpp5d        | 3809.72048 | -0.3462573     | 0.1209231  | -2.86343   | 4.19E-03 | 1.77E-02 |
| Usp40         | 555.023057 | -0.4410936     | 0.13755729 | -3.206375  | 1.34E-03 | 6.79E-03 |
| Arl4c         | 63.898342  | -0.8368909     | 0.25299337 | -3.30081   | 9.64E-04 | 5.10E-03 |
| Lrrfip1       | 2688.75928 | -0.2575479     | 0.10340735 | -2.490602  | 1.28E-02 | 4.42E-02 |
| Ramp1         | 1740.5401  | -0.4046702     | 0.14096085 | -2.870753  | 4.09E-03 | 1.74E-02 |

|               |            |            |            |            |          |          |
|---------------|------------|------------|------------|------------|----------|----------|
| Kihl30        | 10.438771  | -1.7236675 | 0.37899004 | -4.077769  | 4.55E-05 | 3.55E-04 |
| Hes6          | 657.59604  | -0.7117092 | 0.14454546 | -4.923068  | 8.52E-07 | 1.01E-05 |
| Gpr35         | 75.548047  | -2.6579691 | 0.26928699 | -9.521067  | 1.71E-21 | 1.44E-19 |
| Bok           | 145.826576 | -0.8572717 | 0.22587354 | -3.791868  | 1.50E-04 | 1.03E-03 |
| D2hgdh        | 312.255834 | -0.4622314 | 0.14539    | -3.17877   | 1.48E-03 | 7.38E-03 |
| Pdcd1         | 11.846205  | -1.1254029 | 0.37830662 | -2.945894  | 3.22E-03 | 1.43E-02 |
| Fam174a       | 227.833723 | -1.0399944 | 0.1787549  | -5.812391  | 6.16E-09 | 1.08E-07 |
| St8sia4       | 1229.60682 | -0.914202  | 0.12088816 | -7.561426  | 3.99E-14 | 1.59E-12 |
| Bcl2          | 335.7952   | -0.5202049 | 0.15396108 | -3.378278  | 7.29E-04 | 4.06E-03 |
| Dsel          | 40.957952  | -0.9362896 | 0.29281242 | -3.184415  | 1.45E-03 | 7.27E-03 |
| Tmem37        | 79.283409  | -1.5418866 | 0.26287148 | -5.82677   | 5.65E-09 | 9.98E-08 |
| Marco         | 303.566612 | -1.210284  | 0.37099779 | -3.608306  | 3.08E-04 | 1.92E-03 |
| Slc35f5       | 163.687264 | -0.6326214 | 0.1826424  | -3.461983  | 5.36E-04 | 3.11E-03 |
| Cxcr4         | 296.481738 | -0.7523913 | 0.15024659 | -5.005716  | 5.57E-07 | 6.81E-06 |
| Rassf5        | 2512.70681 | -0.762445  | 0.11137203 | -6.845639  | 7.61E-12 | 2.15E-10 |
| Ikike         | 364.943589 | -0.8022793 | 0.15087829 | -5.315429  | 1.06E-07 | 1.51E-06 |
| 5430435G22Rik | 46.127929  | -1.4679953 | 0.28417663 | -5.110225  | 3.22E-07 | 4.13E-06 |
| Nuak2         | 112.451221 | -0.6742043 | 0.2264541  | -2.974732  | 2.93E-03 | 1.32E-02 |
| Tmcc2         | 566.118565 | -0.5816193 | 0.17526495 | -3.318172  | 9.06E-04 | 4.85E-03 |
| Sox13         | 211.509101 | -0.6335615 | 0.18493382 | -3.424664  | 6.16E-04 | 3.50E-03 |
| Lax1          | 960.690148 | -0.6859249 | 0.14782402 | -4.639748  | 3.49E-06 | 3.60E-05 |
| Btg2          | 511.237304 | -0.6661118 | 0.13273164 | -5.017544  | 5.23E-07 | 6.45E-06 |
| Ppfa4         | 253.569979 | -2.0444201 | 0.180834   | -11.256607 | 2.15E-29 | 3.47E-27 |
| Ptpn7         | 3893.6767  | -0.253718  | 0.09654598 | -2.627941  | 8.59E-03 | 3.21E-02 |
| Csrp1         | 2282.44358 | -0.3264794 | 0.10068447 | -3.242562  | 1.18E-03 | 6.10E-03 |
| Tnni1         | 36.160524  | -0.9385977 | 0.30992186 | -3.015163  | 2.57E-03 | 1.18E-02 |
| Kif21b        | 668.820449 | -0.4904754 | 0.12799453 | -3.83173   | 1.27E-04 | 8.92E-04 |
| Ptprc         | 3125.17661 | -0.5464297 | 0.11892359 | -4.594717  | 4.33E-06 | 4.38E-05 |
| Cfh           | 172.66379  | -2.2164097 | 0.22604616 | -9.729227  | 2.26E-22 | 2.07E-20 |
| Rgs2          | 882.952554 | -1.2516032 | 0.11845865 | -10.56197  | 4.47E-26 | 5.40E-24 |
| Rgs1          | 63.608561  | -0.8669807 | 0.26265788 | -3.293074  | 9.91E-04 | 5.23E-03 |
| Hmcn1         | 35.573347  | -0.8976248 | 0.32293435 | -2.768363  | 5.63E-03 | 2.27E-02 |
| Fam129a       | 272.810647 | -1.754933  | 0.17555184 | -9.969993  | 2.06E-23 | 2.04E-21 |
| 1700025G04Rik | 401.511563 | -0.527638  | 0.16237166 | -3.249178  | 1.16E-03 | 5.98E-03 |
| Rgl1          | 444.389792 | -0.9531637 | 0.15618891 | -6.100276  | 1.06E-09 | 2.18E-08 |
| Ncf2          | 1435.8091  | -0.5079398 | 0.11296933 | -4.496094  | 6.92E-06 | 6.65E-05 |
| Npl           | 569.452877 | -0.4099069 | 0.12352098 | -3.318298  | 9.06E-04 | 4.85E-03 |
| Rgs8          | 18.873552  | -0.9691661 | 0.35726132 | -2.691136  | 7.12E-03 | 2.74E-02 |
| Rnasel        | 697.562043 | -0.4295345 | 0.12639249 | -3.398227  | 6.78E-04 | 3.81E-03 |
| Glul          | 680.388305 | -0.3198336 | 0.11679599 | -2.738286  | 6.18E-03 | 2.44E-02 |
| Tor1aip1      | 803.870847 | -0.397085  | 0.11071232 | -3.586479  | 3.35E-04 | 2.07E-03 |
| Soat1         | 413.71809  | -0.4946359 | 0.1467466  | -3.370241  | 7.51E-04 | 4.16E-03 |
| Tor3a         | 493.381777 | -0.8544601 | 0.13940159 | -6.127696  | 8.92E-10 | 1.86E-08 |
| 2810025M15Rik | 489.679253 | -0.3921703 | 0.13286685 | -2.951395  | 3.16E-03 | 1.40E-02 |
| BC026585      | 244.891701 | -0.4156782 | 0.15881208 | -2.616976  | 8.87E-03 | 3.30E-02 |
| Serpinc1      | 23.516913  | -0.974412  | 0.36975618 | -2.630689  | 8.52E-03 | 3.19E-02 |
| Fmo1          | 4.540749   | -1.0260376 | 0.35275543 | -3.000271  | 2.70E-03 | 1.23E-02 |
| Sell          | 737.28846  | -1.2818703 | 0.18220015 | -7.032564  | 2.03E-12 | 6.21E-11 |
| Selp          | 52.2761    | -1.8499318 | 0.30036602 | -6.061877  | 1.35E-09 | 2.69E-08 |
| Rcsd1         | 2287.84024 | -0.4595483 | 0.10815882 | -4.248755  | 2.15E-05 | 1.84E-04 |
| Pbx1          | 154.506397 | -0.6868547 | 0.18209917 | -3.769366  | 1.64E-04 | 1.11E-03 |
| Sh2d1b1       | 21.700767  | -0.8867068 | 0.35858345 | -2.462257  | 1.38E-02 | 4.71E-02 |
| Gm7694        | 73.501315  | -1.2868877 | 0.25534411 | -5.01601   | 5.28E-07 | 6.49E-06 |
| 1700015E13Rik | 9.877991   | -0.9498365 | 0.37870763 | -2.487452  | 1.29E-02 | 4.45E-02 |
| Nos1ap        | 57.755601  | -1.2209646 | 0.28223407 | -4.304212  | 1.68E-05 | 1.48E-04 |
| Fcgr4         | 44.046175  | -1.9398975 | 0.31932958 | -5.944861  | 2.77E-09 | 5.16E-08 |
| Fcgr3         | 503.932696 | -0.5344401 | 0.15358316 | -3.479348  | 5.03E-04 | 2.94E-03 |
| Fcer1g        | 1088.97105 | -1.1609871 | 0.13731421 | -8.45292   | 2.84E-17 | 1.56E-15 |
| Arhgap30      | 3314.74068 | -0.3700518 | 0.11855299 | -3.12138   | 1.80E-03 | 8.77E-03 |
| Usf1          | 879.153928 | -0.5358572 | 0.11974974 | -4.474521  | 7.66E-06 | 7.31E-05 |
| Slamf7        | 4.11154    | -0.865089  | 0.35124923 | -2.442988  | 1.46E-02 | 4.92E-02 |
| Cd48          | 2475.78232 | -0.3984236 | 0.11826424 | -3.368885  | 7.55E-04 | 4.18E-03 |
| Cd84          | 631.892239 | -0.4629575 | 0.13094738 | -3.535172  | 4.08E-04 | 2.45E-03 |
| Vangl2        | 174.71839  | -0.7289031 | 0.20440625 | -3.563875  | 3.65E-04 | 2.23E-03 |
| Pea15a        | 174.545511 | -0.7460543 | 0.18377353 | -4.056993  | 4.97E-05 | 3.85E-04 |
| Slamf8        | 5.618738   | -1.3242757 | 0.36116551 | -4.009018  | 6.10E-05 | 4.61E-04 |
| Pydc4         | 19.837732  | -1.4962093 | 0.36780788 | -3.995414  | 6.46E-05 | 4.83E-04 |
| Pyhin1        | 222.403333 | -2.4976351 | 0.24355165 | -10.176268 | 2.53E-24 | 2.67E-22 |
| Pydc3         | 65.84181   | -1.6189354 | 0.30605387 | -5.250938  | 1.51E-07 | 2.08E-06 |
| Al607873      | 164.864536 | -2.1542661 | 0.24140903 | -8.859791  | 8.02E-19 | 5.35E-17 |

|               |            |            |            |            |          |          |
|---------------|------------|------------|------------|------------|----------|----------|
| Ifi204        | 148.949477 | -3.3529713 | 0.25522937 | -12.644185 | 1.20E-36 | 3.20E-34 |
| Mndal         | 1030.2928  | -1.197516  | 0.13405034 | -8.930951  | 4.22E-19 | 2.88E-17 |
| Mnda          | 31.551614  | -2.6707619 | 0.35770123 | -6.651123  | 9.12E-11 | 7.56E-10 |
| Ifi203        | 1313.22066 | -1.0716611 | 0.12094456 | -8.859311  | 8.05E-19 | 5.35E-17 |
| Ifi205        | 19.522026  | -2.758035  | 0.37244694 | -5.29139   | 1.21E-07 | 1.70E-06 |
| Olfr433       | 13.406425  | -1.4134381 | 0.37504312 | -3.667089  | 2.45E-04 | 1.58E-03 |
| Kmo           | 108.338369 | -2.5182755 | 0.23149145 | -10.657355 | 1.61E-26 | 2.07E-24 |
| Sdcccag8      | 385.401283 | -0.4017657 | 0.13802561 | -2.910504  | 3.61E-03 | 1.56E-02 |
| Hmga2-ps1     | 53.181314  | -0.9527233 | 0.28639246 | -3.315959  | 9.13E-04 | 4.88E-03 |
| Akt3          | 120.580774 | -0.4862513 | 0.19809132 | -2.453674  | 1.41E-02 | 4.81E-02 |
| Zbtb18        | 226.523113 | -0.7433715 | 0.16898621 | -4.396858  | 1.10E-05 | 1.01E-04 |
| Adck3         | 402.718742 | -0.7615315 | 0.14639851 | -5.200282  | 1.99E-07 | 2.69E-06 |
| Ephx1         | 22.982992  | -1.2085894 | 0.34136209 | -3.49825   | 4.68E-04 | 2.77E-03 |
| Dusp10        | 54.491066  | -0.7787984 | 0.2754115  | -2.821677  | 4.78E-03 | 1.98E-02 |
| Hlx           | 90.809409  | -1.6823443 | 0.23478455 | -7.110372  | 1.16E-12 | 3.72E-11 |
| Lyplal1       | 104.380248 | -0.7871481 | 0.21854276 | -3.597603  | 3.21E-04 | 1.99E-03 |
| Vash2         | 38.922426  | -0.8772787 | 0.30315188 | -2.883386  | 3.93E-03 | 1.68E-02 |
| Batf3         | 19.54319   | -2.1823704 | 0.36353594 | -5.468684  | 4.53E-08 | 6.83E-07 |
| Atf3          | 23.917815  | -1.9239394 | 0.34567051 | -5.327007  | 9.98E-08 | 1.42E-06 |
| Tmem206       | 871.593819 | -0.4501069 | 0.12380272 | -3.635497  | 2.77E-04 | 1.76E-03 |
| Traf5         | 122.489507 | -0.8198342 | 0.2093856  | -3.911035  | 9.19E-05 | 6.65E-04 |
| Irf6          | 61.922869  | -0.7805568 | 0.26291401 | -2.963354  | 3.04E-03 | 1.36E-02 |
| Traf3ip3      | 1731.45163 | -0.7179701 | 0.11020298 | -6.514615  | 7.29E-11 | 1.78E-09 |
| Cd34          | 9683.69267 | -0.4213118 | 0.10258039 | -4.107124  | 4.01E-05 | 3.17E-04 |
| Gm16897       | 73.113509  | -0.7525301 | 0.23454047 | -3.203273  | 1.36E-03 | 6.85E-03 |
| Plekhg1       | 40.318898  | -1.1036259 | 0.29728326 | -3.689482  | 2.25E-04 | 1.46E-03 |
| Ipcef1        | 264.194271 | -0.4518361 | 0.14942761 | -3.023248  | 2.50E-03 | 1.16E-02 |
| Cnksr3        | 226.423297 | -0.7091858 | 0.16816995 | -4.215002  | 2.50E-05 | 2.10E-04 |
| Zc3h12d       | 27.619494  | -1.5089608 | 0.32926164 | -4.49895   | 6.83E-06 | 6.58E-05 |
| Tab2          | 983.102248 | -0.313235  | 0.10703087 | -2.926516  | 3.43E-03 | 1.50E-02 |
| Sash1         | 33.925176  | -0.8159274 | 0.30489433 | -2.666207  | 7.67E-03 | 2.92E-02 |
| Adgb          | 25.036134  | -1.2569654 | 0.33635258 | -3.692187  | 2.22E-04 | 1.45E-03 |
| Rab32         | 825.630546 | -0.9159217 | 0.12483705 | -7.335504  | 2.21E-13 | 7.99E-12 |
| Utrn          | 1102.60761 | -0.3661087 | 0.11082579 | -3.303369  | 9.55E-04 | 5.07E-03 |
| Phactr2       | 506.266342 | -0.8636041 | 0.13812844 | -6.250358  | 4.10E-10 | 8.99E-09 |
| Hivep2        | 88.105779  | -0.9535841 | 0.27207284 | -3.499251  | 4.67E-04 | 2.76E-03 |
| Abracl        | 1109.08142 | -0.2611058 | 0.10252667 | -2.546669  | 1.09E-02 | 3.89E-02 |
| Ccdc28a       | 145.02032  | -0.5449366 | 0.18435135 | -2.954623  | 3.13E-03 | 1.39E-02 |
| Nhs1          | 51.249466  | -0.6680974 | 0.26657909 | -2.501816  | 1.24E-02 | 4.32E-02 |
| Ifngr1        | 2038.15528 | -0.3126654 | 0.10061382 | -3.107539  | 1.89E-03 | 9.13E-03 |
| Slc35d3       | 378.600119 | -1.0760163 | 0.15660624 | -6.8667    | 6.57E-12 | 1.89E-10 |
| Map3k5        | 211.165384 | -0.6608633 | 0.17655591 | -3.741587  | 1.83E-04 | 1.22E-03 |
| Stx7          | 915.15172  | -0.4010245 | 0.10834961 | -3.701062  | 2.15E-04 | 1.41E-03 |
| Epb4.1i2      | 900.702449 | -0.5414762 | 0.1229326  | -4.404395  | 1.06E-05 | 9.81E-05 |
| L3mbtl3       | 239.06999  | -0.4000933 | 0.16047261 | -2.492882  | 1.27E-02 | 4.40E-02 |
| Arhgap18      | 1279.51019 | -0.521925  | 0.12583358 | -4.147567  | 3.36E-05 | 2.72E-04 |
| Ptprk         | 97.097929  | -1.5947029 | 0.25610456 | -6.192181  | 5.93E-10 | 1.26E-08 |
| Zufsp         | 303.793749 | -0.4872755 | 0.14712091 | -3.311498  | 9.28E-04 | 4.95E-03 |
| Fam26f        | 66.130268  | -1.0251919 | 0.24746146 | -4.128769  | 3.65E-05 | 2.92E-04 |
| Dse           | 160.58509  | -1.882562  | 0.19703034 | -9.499996  | 2.10E-21 | 1.72E-19 |
| Tspyl4        | 125.005512 | -0.5565277 | 0.20811415 | -2.672842  | 7.52E-03 | 2.87E-02 |
| Marcks        | 477.468113 | -1.0593661 | 0.15558925 | -6.805686  | 1.01E-11 | 2.78E-10 |
| Cdk19         | 1191.54737 | -0.53179   | 0.10536004 | -5.047116  | 4.49E-07 | 5.59E-06 |
| Smpd2         | 284.425191 | -0.6278466 | 0.1536188  | -4.085897  | 4.39E-05 | 3.45E-04 |
| Aim1          | 83.006095  | -1.2576876 | 0.2414318  | -5.187602  | 2.13E-07 | 2.86E-06 |
| Prdm1         | 19.661104  | -1.2648871 | 0.35276042 | -3.532646  | 4.11E-04 | 2.47E-03 |
| Lilrb4        | 108.783534 | -1.3057967 | 0.21598523 | -6.024373  | 1.70E-09 | 3.32E-08 |
| Dcbld1        | 43.042288  | -1.0702131 | 0.28937889 | -3.678934  | 2.34E-04 | 1.51E-03 |
| Msl3l2        | 70.297085  | -0.6994979 | 0.24053942 | -2.90377   | 3.69E-03 | 1.59E-02 |
| Gja1          | 301.619259 | -0.9238585 | 0.15548312 | -5.938391  | 2.88E-09 | 5.36E-08 |
| Fabp7         | 2.352255   | -0.6709716 | 0.30413738 | -2.622255  | 8.74E-03 | 3.25E-02 |
| Smpdl3a       | 606.363415 | -0.4271123 | 0.13757494 | -3.104401  | 1.91E-03 | 9.21E-03 |
| Sowahc        | 24.061948  | -1.4055449 | 0.33975066 | -4.067135  | 4.76E-05 | 3.70E-04 |
| Ddit4         | 122.972592 | -1.2462708 | 0.20942901 | -5.934305  | 2.95E-09 | 5.48E-08 |
| Psap          | 7838.36342 | -1.1323748 | 0.1079819  | -10.486398 | 9.98E-26 | 1.18E-23 |
| 4632428N05Rik | 675.63337  | -1.1212519 | 0.1341911  | -8.352488  | 6.68E-17 | 3.53E-15 |
| Slc29a3       | 781.110505 | -0.8241945 | 0.12225192 | -6.740596  | 1.58E-11 | 4.28E-10 |
| Pcbd1         | 68.689596  | -0.9155501 | 0.24745178 | -3.690484  | 2.24E-04 | 1.46E-03 |
| Sgpl1         | 821.477675 | -0.4260845 | 0.11231673 | -3.793408  | 1.49E-04 | 1.02E-03 |
| Pald1         | 76.465361  | -0.8155813 | 0.24007551 | -3.390962  | 6.96E-04 | 3.90E-03 |

|        |            |            |            |           |          |          |
|--------|------------|------------|------------|-----------|----------|----------|
| Tet1   | 864.980979 | -0.4194313 | 0.12117189 | -3.461308 | 5.38E-04 | 3.11E-03 |
| Arid5b | 155.894161 | -0.760917  | 0.18360318 | -4.141127 | 3.46E-05 | 2.79E-04 |

**Table S9:** ERV families significantly upregulated in *Setdb1<sup>Δvav</sup>* LT-HSCs

| ERV family                | baseMean    | log2FoldChange | lfcSE       | stat        | pvalue   | padj        |
|---------------------------|-------------|----------------|-------------|-------------|----------|-------------|
| RLTR50A LTR ERVK          | 115.3087637 | 4.533159221    | 0.435083149 | 9.561292439 | 1.16E-21 | 1.76E-19    |
| MER74C LTR ERVL           | 60.86860916 | 3.872425015    | 0.444044979 | 8.040695305 | 8.93E-16 | 5.42E-14    |
| IAPLTR3-int LTR ERVK      | 424.1192674 | 3.533401388    | 0.327992663 | 10.72363884 | 7.88E-27 | 2.39E-24    |
| ERVB4_1-I_MM-int LTR ERVK | 315.9321202 | 3.4898036      | 0.36392553  | 9.53538359  | 1.49E-21 | 1.81E-19    |
| MuLV-int LTR ERV1         | 22922.2934  | 3.039734155    | 0.233035461 | 13.04413417 | 6.86E-39 | 4.17E-36    |
| ERVB4_2-I_MM-int LTR ERVK | 356.5933941 | 2.968110392    | 0.453625471 | 6.573314453 | 4.92E-11 | 2.30E-09    |
| RLTR6C_Mm LTR ERV1        | 60.72438053 | 2.69618733     | 0.313394163 | 8.451187    | 2.88E-17 | 2.19E-15    |
| RLTR45 LTR ERVK           | 288.6002807 | 2.493699688    | 0.307778932 | 8.084902775 | 6.22E-16 | 4.20E-14    |
| IAPLTR4 LTR ERVK          | 88.5827766  | 2.422171983    | 0.337590193 | 7.121798244 | 1.07E-12 | 5.39E-11    |
| MMERVK10C-int LTR ERVK    | 4211.197678 | 2.330897416    | 0.303676898 | 7.676101582 | 1.64E-14 | 9.05E-13    |
| RLTR10C LTR ERVK          | 1004.051256 | 2.300374391    | 0.429998961 | 5.362872898 | 8.19E-08 | 3.31E-06    |
| MMVL30-int LTR ERV1       | 1625.49848  | 2.271243474    | 0.25075945  | 9.055488101 | 1.36E-19 | 1.38E-17    |
| MMTV-int LTR ERVK         | 2346.616032 | 2.177523161    | 0.519621572 | 4.343993242 | 1.40E-05 | 0.000404423 |
| RLTR3_Mm LTR ERVK         | 151.4994152 | 2.009509415    | 0.38034619  | 5.274264254 | 1.33E-07 | 5.06E-06    |
| MMERVK9C_I-int LTR ERVK   | 777.712505  | 1.813424411    | 0.430303418 | 4.220603425 | 2.44E-05 | 0.000643022 |
| RLTR45-int LTR ERVK       | 1171.273351 | 1.537845251    | 0.152967061 | 10.05209711 | 8.99E-24 | 1.82E-21    |
| RLTR4_Mm LTR ERV1         | 1552.67623  | 1.431960201    | 0.166509462 | 8.599135905 | 8.03E-18 | 6.96E-16    |
| RMER17A-int LTR ERVK      | 112.8897621 | 1.378754235    | 0.309312048 | 4.45188001  | 8.51E-06 | 0.000287049 |
| IAP1-MM_LTR LTR ERVK      | 71.95243687 | 1.344447962    | 0.280063154 | 4.790628455 | 1.66E-06 | 5.94E-05    |
| IAP-d-int LTR ERVK        | 83.46731214 | 1.171041168    | 0.27241038  | 4.293984673 | 1.75E-05 | 0.000484206 |
| RLTR27 LTR ERVK           | 142.9454108 | 1.014595359    | 0.233136987 | 4.350011722 | 1.36E-05 | 0.000404423 |

**Table S10:** ERV families significantly upregulated in *Setdb1<sup>Δvav</sup>* MPPs

| ERV family                | baseMean    | log2FoldChange | lfcSE       | stat        | pvalue      | padj        |
|---------------------------|-------------|----------------|-------------|-------------|-------------|-------------|
| RLTR50A LTR ERVK          | 112.7377492 | 6.929567457    | 0.582665062 | 10.07538056 | 7.10E-24    | 1.48E-22    |
| IAPLTR3-int LTR ERVK      | 1322.760671 | 5.957725342    | 0.157610998 | 37.62674776 | 0           | 0           |
| ERVB4_2-I_MM-int LTR ERVK | 897.0974631 | 5.910899848    | 0.234652904 | 25.04700266 | 1.88E-138   | 3.26E-136   |
| MER74C LTR ERVL           | 86.60942973 | 5.554551083    | 0.443789845 | 11.79587217 | 4.10E-32    | 1.07E-30    |
| ERVB4_2-LTR_MM LTR ERVK   | 13.59193799 | 5.082019253    | 0.853016671 | 5.094731889 | 3.49E-07    | 3.78E-06    |
| MURVY-int LTR ERV1        | 91.12981362 | 4.575814994    | 0.377260772 | 11.88992911 | 1.34E-32    | 3.65E-31    |
| ERVB4_1-I_MM-int LTR ERVK | 470.7609106 | 4.463654539    | 0.235284245 | 18.91930749 | 7.91E-80    | 4.11E-78    |
| RLTR6C_Mm LTR ERV1        | 173.4371546 | 4.36015532     | 0.284265451 | 15.21781907 | 2.69E-52    | 1.00E-50    |
| IAPLTR4 LTR ERVK          | 190.9319203 | 4.255906444    | 0.217054451 | 19.46185888 | 2.31E-84    | 1.34E-82    |
| RLTR10C LTR ERVK          | 1821.47028  | 4.104850424    | 0.186450461 | 22.00638463 | 2.50E-107   | 1.86E-105   |
| MMERVK10C-int LTR ERVK    | 6983.174981 | 4.072903087    | 0.169537979 | 24.02112512 | 1.67E-127   | 2.17E-125   |
| RLTR45 LTR ERVK           | 566.3067057 | 4.04025705     | 0.196402788 | 20.54051038 | 9.36E-94    | 6.08E-92    |
| MuLV-int LTR ERV1         | 49020.75262 | 3.952581031    | 0.08330411  | 47.44701156 | 0           | 0           |
| RLTR45-int LTR ERVK       | 3108.836542 | 3.505584294    | 0.148604976 | 23.58676223 | 5.27E-123   | 5.48E-121   |
| RMER17A-int LTR ERVK      | 201.7851635 | 3.468191276    | 0.200183696 | 17.275576   | 7.19E-67    | 2.87E-65    |
| MMERVK9C_I-int LTR ERVK   | 1325.062329 | 3.4538709      | 0.186990354 | 18.46522903 | 3.93E-76    | 1.86E-74    |
| MMVL30-int LTR ERV1       | 3233.052446 | 3.225050534    | 0.181720952 | 17.74557956 | 1.86E-70    | 8.08E-69    |
| RLTR44E LTR ERVK          | 27.28419614 | 3.184298209    | 0.464966709 | 6.735763031 | 1.63E-11    | 2.42E-10    |
| MMTV-int LTR ERVK         | 2191.701474 | 3.045928684    | 0.209597331 | 14.53065152 | 7.75E-48    | 2.52E-46    |
| ERVB3_1-I_MM-int LTR ERVK | 75.54907149 | 2.745359668    | 0.257769033 | 10.61163017 | 2.63E-26    | 5.70E-25    |
| RLTR10B2 LTR ERVK         | 108.4660333 | 2.543976306    | 0.262208818 | 9.685157987 | 3.49E-22    | 6.97E-21    |
| IAP-d-int LTR ERVK        | 86.40761865 | 2.4991614      | 0.220819874 | 11.28977001 | 1.47E-29    | 3.65E-28    |
| ERVB7_3-LTR_MM LTR ERVK   | 43.23376955 | 2.105487905    | 0.298962955 | 7.02196083  | 2.19E-12    | 3.56E-11    |
| RLTR4_Mm LTR ERV1         | 2450.483703 | 2.078628927    | 0.090289422 | 23.02102007 | 2.87E-117   | 2.49E-115   |
| MMERVK10D3_I-int LTR ERVK | 123.6100053 | 2.007497073    | 0.178466267 | 11.23856713 | 2.64E-29    | 6.23E-28    |
| RLTR44D LTR ERVK          | 12.13499142 | 1.792437478    | 0.463831404 | 3.835949484 | 0.00012508  | 0.001084028 |
| RLTR1B-int LTR ERV1       | 528.99291   | 1.740523579    | 0.136122299 | 12.78500076 | 1.99E-37    | 6.08E-36    |
| RLTR44B LTR ERVK          | 13.01648345 | 1.720522959    | 0.462942944 | 3.694239318 | 0.000220546 | 0.001791936 |
| IAPLTR1a_Mm LTR ERVK      | 551.2716564 | 1.690250188    | 0.139320805 | 12.13087356 | 7.25E-34    | 2.09E-32    |
| RLTR13D6 LTR ERVK         | 106.922081  | 1.66631935     | 0.182631626 | 9.118213844 | 7.64E-20    | 1.47E-18    |
| RLTR3_Mm LTR ERVK         | 146.8750921 | 1.647747567    | 0.241466415 | 6.821636068 | 9.00E-12    | 1.42E-10    |
| MMERGLN-int LTR ERV1      | 4888.177287 | 1.605707858    | 0.212633343 | 7.551467244 | 4.30E-14    | 7.99E-13    |
| RLTR1B LTR ERV1           | 198.8568471 | 1.546579957    | 0.14474028  | 10.68237573 | 1.23E-26    | 2.78E-25    |
| RLTR10B LTR ERVK          | 35.11920961 | 1.434639777    | 0.285223944 | 5.022919307 | 5.09E-07    | 5.29E-06    |

|                            |             |             |             |             |             |             |
|----------------------------|-------------|-------------|-------------|-------------|-------------|-------------|
| IAPEY4_I-int LTR ERVK      | 1699.292889 | 1.375984536 | 0.091758534 | 14.99543491 | 7.86E-51    | 2.73E-49    |
| RLTR10D2 LTR ERVK          | 16.07381209 | 1.351069369 | 0.39536102  | 3.408108323 | 0.000654149 | 0.004535435 |
| RLTR6-int LTR ERV1         | 1545.361106 | 1.342205529 | 0.180814296 | 7.422980167 | 1.15E-13    | 2.05E-12    |
| ERVb7_2-LTR_MM LTR ERVK    | 277.7063945 | 1.320835098 | 0.186214205 | 7.092319668 | 1.32E-12    | 2.21E-11    |
| ETnERV3-int LTR ERVK       | 216.0890444 | 1.22415767  | 0.183588255 | 6.667117705 | 2.61E-11    | 3.57E-10    |
| IAP1-MM_LTR LTR ERVK       | 29.65836329 | 1.171322935 | 0.309980158 | 3.774939659 | 0.000160046 | 0.00136433  |
| RLTR6_Mm LTR ERV1          | 177.0688217 | 1.137927028 | 0.185855389 | 6.121885718 | 9.25E-10    | 1.17E-08    |
| IAPEz-int LTR ERVK         | 6025.906718 | 1.127922157 | 0.158440591 | 7.118875564 | 1.09E-12    | 1.89E-11    |
| ETnERV-int LTR ERVK        | 352.3709473 | 1.06976194  | 0.161177729 | 6.636797323 | 3.21E-11    | 4.27E-10    |
| RLTR10F LTR ERVK           | 68.98179147 | 1.053555807 | 0.209099229 | 5.036930087 | 4.73E-07    | 5.02E-06    |
| ERVb4_1B-I_MM-int LTR ERVK | 85.78410188 | 1.03679133  | 0.181763355 | 5.702631437 | 1.18E-08    | 1.36E-07    |
| RMER16A3 LTR ERVK          | 30.77697187 | 1.026735636 | 0.292468527 | 3.508177612 | 0.000451188 | 0.003301675 |

**Table S11:** ERV families with significantly increased chromatin accessibility in *Setdb1<sup>val</sup>* MPPs

| ERV family     | baseMean         | log2FoldChange    | lfcSE              | stat             | pvalue               | padj                 |
|----------------|------------------|-------------------|--------------------|------------------|----------------------|----------------------|
| ERVb4_2-LTR_MM | 4579.73425703304 | 0.623163500748701 | 0.0758881708118468 | 8.32854275837693 | 8.1843511083208e-17  | 1.01813327787511e-13 |
| RLTR6C_Mm      | 1846.54614192159 | 0.578992689651464 | 0.0763890561374721 | 7.61577095343994 | 2.62122151058355e-14 | 1.63039977958297e-11 |
| RLTR45         | 46523.5385922518 | 0.364362719187501 | 0.0644538212359918 | 5.93950721014413 | 2.85880104194219e-09 | 1.18544949872536e-06 |
| RLTR10B        | 3327.37366274259 | 0.329236891830772 | 0.0726745629106498 | 4.5325581952792  | 5.82736143430936e-06 | 0.00122685699227536  |
| RLTR4_Mm       | 5769.20617268126 | 0.306861495195111 | 0.0764487231671018 | 4.02184009302607 | 5.77452563184084e-05 | 0.0102621569800143   |
| RLTR44A        | 2243.27133827018 | 0.257756118032041 | 0.071905198614013  | 3.58581678955108 | 0.000336024814958508 | 0.0380013518007622   |
| RLTR10C        | 53526.3487713016 | 0.236416744670636 | 0.0547547907800018 | 4.61557734081547 | 3.92004019059855e-06 | 0.00121913249927615  |
| MuLV-int       | 8835.0461121663  | 0.236410256622205 | 0.0649536622708368 | 3.64007064044257 | 0.000272563254332021 | 0.0348982233588489   |
| RLTR10B2       | 14100.9341017979 | 0.227545021695776 | 0.0592072914994421 | 3.98160943415245 | 6.84501924459093e-05 | 0.0106440049253389   |
| ORR1B2         | 73031.3612633982 | 0.222184091566354 | 0.0490551840842682 | 4.52932233626524 | 5.91731668300015e-06 | 0.00122685699227536  |
| ORR1C1         | 57251.7284189947 | 0.154299573476277 | 0.0424761562203273 | 3.63264362118272 | 0.000280532342112934 | 0.0348982233588489   |

## SI References

1. J. Brind'Amour, *et al.*, An ultra-low-input native ChIP-seq protocol for genome-wide profiling of rare cell populations. *Nat. Commun.* **6**, 6033 (2015).
2. M. R. Corces, *et al.*, An improved ATAC-seq protocol reduces background and enables interrogation of frozen tissues. *Nat. Methods* **14**, 959–962 (2017).
3. S. Pundhir, *et al.*, Enhancer and Transcription Factor Dynamics during Myeloid Differentiation Reveal an Early Differentiation Block in *Cebpa* null Progenitors. *Cell Rep.* **23**, 2744–2757 (2018).
